# Supplementary material
Source: MDPI journal article supplement (https://www.mdpi.com/1999-4907/11/12/1261)
Supplement: s1 [file s1]

**OBSERVATION SHEET 3**

|          |                                                                                                                                                                                                                                                                                                                                                                                                                                |                                                                                                                                                                                                                                                                                                                                                                                                                                                                                                                                                                                                                                                                                                                                                                                                                                                                                                                                                                                                                                                                                                                                                                       |                                                                                                                                                                                                                                                                                                                                                                         |                          |                          |                          |                          |  |  |  |                                     |                          |                          |                          |                          |                          |                          |    |  |  |  |  |  |  |  |                          |                          |                          |                          |                          |                          |                          |     |  |  |  |  |  |  |  |                          |                          |                          |                          |                          |                          |                          |                                                                                                                               |                                                                                                                       |
|----------|--------------------------------------------------------------------------------------------------------------------------------------------------------------------------------------------------------------------------------------------------------------------------------------------------------------------------------------------------------------------------------------------------------------------------------|-----------------------------------------------------------------------------------------------------------------------------------------------------------------------------------------------------------------------------------------------------------------------------------------------------------------------------------------------------------------------------------------------------------------------------------------------------------------------------------------------------------------------------------------------------------------------------------------------------------------------------------------------------------------------------------------------------------------------------------------------------------------------------------------------------------------------------------------------------------------------------------------------------------------------------------------------------------------------------------------------------------------------------------------------------------------------------------------------------------------------------------------------------------------------|-------------------------------------------------------------------------------------------------------------------------------------------------------------------------------------------------------------------------------------------------------------------------------------------------------------------------------------------------------------------------|--------------------------|--------------------------|--------------------------|--------------------------|--|--|--|-------------------------------------|--------------------------|--------------------------|--------------------------|--------------------------|--------------------------|--------------------------|----|--|--|--|--|--|--|--|--------------------------|--------------------------|--------------------------|--------------------------|--------------------------|--------------------------|--------------------------|-----|--|--|--|--|--|--|--|--------------------------|--------------------------|--------------------------|--------------------------|--------------------------|--------------------------|--------------------------|-------------------------------------------------------------------------------------------------------------------------------|-----------------------------------------------------------------------------------------------------------------------|
| <p>1</p> | <p><b>Location of the object</b></p> <p>City:<br/>Wrocław</p> <p>District:<br/>Przedmieście Oławskie</p> <p>Street:<br/>Hauke-Bossaka</p> <p>Geographical coordinates:<br/>51°06'19.5"N 17°02'38.3"E</p>                                                                                                                                                                                                                       | <p><b>Location map</b></p>                                                                                                                                                                                                                                                                                                                                                                                                                                                                                                                                                                                                                                                                                                                                                                                                                                                                                                                                                                                                                                                           | <p><b>Inventory data</b></p> <p>Species:<br/><i>Aesculus hippocastanum</i></p> <p>Height: 10,8 m</p> <p>Tree crown width 12 m</p> <p>The circumference of the trunk at a height of 5 cm [cm]: 180 cm</p> <p>The circumference of the trunk at a height of 130 cm [cm]: 142 cm</p> <p>Sanitary condition:<br/>Traces of sanitary cuts, very good sanitary condition.</p> |                          |                          |                          |                          |  |  |  |                                     |                          |                          |                          |                          |                          |                          |    |  |  |  |  |  |  |  |                          |                          |                          |                          |                          |                          |                          |     |  |  |  |  |  |  |  |                          |                          |                          |                          |                          |                          |                          |                                                                                                                               |                                                                                                                       |
| <p>2</p> | <p><b>Surroundings:</b></p> <ul style="list-style-type: none"> <li><input checked="" type="checkbox"/> Street</li> <li><input type="checkbox"/> Green areas</li> <li><input type="checkbox"/> Low buildings</li> <li><input type="checkbox"/> High-rise Building</li> <li><input type="checkbox"/> Water</li> </ul> <p><b>Position:</b></p>  | <p><b>Photograph of the object in the vicinity</b></p>  <p><b>Description of the environment</b></p> <p>The object is located directly on the road, in a narrow green belt. The street is characterized by moderate traffic. It is surrounded on both sides by 5-story multi-family buildings.</p>                                                                                                                                                                                                                                                                                                                                                                                                                                                                                                                                                                                                                                                                                                                                                                                  |                                                                                                                                                                                                                                                                                                                                                                         |                          |                          |                          |                          |  |  |  |                                     |                          |                          |                          |                          |                          |                          |    |  |  |  |  |  |  |  |                          |                          |                          |                          |                          |                          |                          |     |  |  |  |  |  |  |  |                          |                          |                          |                          |                          |                          |                          |                                                                                                                               |                                                                                                                       |
| <p>3</p> | <p><b>Date of observation</b></p> <p>1.03.17</p>                                                                                                                                                                                                                                                                                                                                                                               | <p><b>Phenophase</b></p> <table border="1"> <tr> <td rowspan="2">I</td> <td></td> <td></td> <td></td> <td></td> <td></td> <td></td> <td></td> </tr> <tr> <td><input checked="" type="checkbox"/></td> <td><input type="checkbox"/></td> <td><input type="checkbox"/></td> <td><input type="checkbox"/></td> <td><input type="checkbox"/></td> <td><input type="checkbox"/></td> <td><input type="checkbox"/></td> </tr> <tr> <td rowspan="2">II</td> <td></td> <td></td> <td></td> <td></td> <td></td> <td></td> <td></td> </tr> <tr> <td><input type="checkbox"/></td> </tr> <tr> <td rowspan="2">III</td> <td></td> <td></td> <td></td> <td></td> <td></td> <td></td> <td></td> </tr> <tr> <td><input type="checkbox"/></td> </tr> </table> | I                                                                                                                                                                                                                                                                                                                                                                       |                          |                          |                          |                          |  |  |  | <input checked="" type="checkbox"/> | <input type="checkbox"/> | II |  |  |  |  |  |  |  | <input type="checkbox"/> | III |  |  |  |  |  |  |  | <input type="checkbox"/> | <p><b>Photo of the entire object</b></p>  | <p><b>Photos of details</b></p>  |
| I        |                                                                                                                                                                                                                                                                                                                                                                                                                                |                                                                                                                                                                                                                                                                                                                                                                                                                                                                                                                                                                                                                                                                                                                                                                                                                                                                                                                                                                                                                                                                                                                                                                       |                                                                                                                                                                                                                                                                                                                                                                         |                          |                          |                          |                          |  |  |  |                                     |                          |                          |                          |                          |                          |                          |    |  |  |  |  |  |  |  |                          |                          |                          |                          |                          |                          |                          |     |  |  |  |  |  |  |  |                          |                          |                          |                          |                          |                          |                          |                                                                                                                               |                                                                                                                       |
|          | <input checked="" type="checkbox"/>                                                                                                                                                                                                                                                                                                                                                                                            | <input type="checkbox"/>                                                                                                                                                                                                                                                                                                                                                                                                                                                                                                                                                                                                                                                                                                                                                                                                                                                                                                                                                                                                                                                                                                                                              | <input type="checkbox"/>                                                                                                                                                                                                                                                                                                                                                | <input type="checkbox"/> | <input type="checkbox"/> | <input type="checkbox"/> | <input type="checkbox"/> |  |  |  |                                     |                          |                          |                          |                          |                          |                          |    |  |  |  |  |  |  |  |                          |                          |                          |                          |                          |                          |                          |     |  |  |  |  |  |  |  |                          |                          |                          |                          |                          |                          |                          |                                                                                                                               |                                                                                                                       |
| II       |                                                                                                                                                                                                                                                                                                                                                                                                                                |                                                                                                                                                                                                                                                                                                                                                                                                                                                                                                                                                                                                                                                                                                                                                                                                                                                                                                                                                                                                                                                                                                                                                                       |                                                                                                                                                                                                                                                                                                                                                                         |                          |                          |                          |                          |  |  |  |                                     |                          |                          |                          |                          |                          |                          |    |  |  |  |  |  |  |  |                          |                          |                          |                          |                          |                          |                          |     |  |  |  |  |  |  |  |                          |                          |                          |                          |                          |                          |                          |                                                                                                                               |                                                                                                                       |
|          | <input type="checkbox"/>                                                                                                                                                                                                                                                                                                                                                                                                       | <input type="checkbox"/>                                                                                                                                                                                                                                                                                                                                                                                                                                                                                                                                                                                                                                                                                                                                                                                                                                                                                                                                                                                                                                                                                                                                              | <input type="checkbox"/>                                                                                                                                                                                                                                                                                                                                                | <input type="checkbox"/> | <input type="checkbox"/> | <input type="checkbox"/> | <input type="checkbox"/> |  |  |  |                                     |                          |                          |                          |                          |                          |                          |    |  |  |  |  |  |  |  |                          |                          |                          |                          |                          |                          |                          |     |  |  |  |  |  |  |  |                          |                          |                          |                          |                          |                          |                          |                                                                                                                               |                                                                                                                       |
| III      |                                                                                                                                                                                                                                                                                                                                                                                                                                |                                                                                                                                                                                                                                                                                                                                                                                                                                                                                                                                                                                                                                                                                                                                                                                                                                                                                                                                                                                                                                                                                                                                                                       |                                                                                                                                                                                                                                                                                                                                                                         |                          |                          |                          |                          |  |  |  |                                     |                          |                          |                          |                          |                          |                          |    |  |  |  |  |  |  |  |                          |                          |                          |                          |                          |                          |                          |     |  |  |  |  |  |  |  |                          |                          |                          |                          |                          |                          |                          |                                                                                                                               |                                                                                                                       |
|          | <input type="checkbox"/>                                                                                                                                                                                                                                                                                                                                                                                                       | <input type="checkbox"/>                                                                                                                                                                                                                                                                                                                                                                                                                                                                                                                                                                                                                                                                                                                                                                                                                                                                                                                                                                                                                                                                                                                                              | <input type="checkbox"/>                                                                                                                                                                                                                                                                                                                                                | <input type="checkbox"/> | <input type="checkbox"/> | <input type="checkbox"/> | <input type="checkbox"/> |  |  |  |                                     |                          |                          |                          |                          |                          |                          |    |  |  |  |  |  |  |  |                          |                          |                          |                          |                          |                          |                          |     |  |  |  |  |  |  |  |                          |                          |                          |                          |                          |                          |                          |                                                                                                                               |                                                                                                                       |
| <p>4</p> | <p><b>Date of observation</b></p> <p>7.03.17</p>                                                                                                                                                                                                                                                                                                                                                                               | <p><b>Phenophase</b></p> <table border="1"> <tr> <td rowspan="2">I</td> <td></td> <td></td> <td></td> <td></td> <td></td> <td></td> <td></td> </tr> <tr> <td><input checked="" type="checkbox"/></td> <td><input type="checkbox"/></td> <td><input type="checkbox"/></td> <td><input type="checkbox"/></td> <td><input type="checkbox"/></td> <td><input type="checkbox"/></td> <td><input type="checkbox"/></td> </tr> <tr> <td rowspan="2">II</td> <td></td> <td></td> <td></td> <td></td> <td></td> <td></td> <td></td> </tr> <tr> <td><input type="checkbox"/></td> </tr> <tr> <td rowspan="2">III</td> <td></td> <td></td> <td></td> <td></td> <td></td> <td></td> <td></td> </tr> <tr> <td><input type="checkbox"/></td> </tr> </table> | I                                                                                                                                                                                                                                                                                                                                                                       |                          |                          |                          |                          |  |  |  | <input checked="" type="checkbox"/> | <input type="checkbox"/> | II |  |  |  |  |  |  |  | <input type="checkbox"/> | III |  |  |  |  |  |  |  | <input type="checkbox"/> | <p><b>Photo of the entire object</b></p>  | <p><b>Photos of details</b></p>  |
| I        |                                                                                                                                                                                                                                                                                                                                                                                                                                |                                                                                                                                                                                                                                                                                                                                                                                                                                                                                                                                                                                                                                                                                                                                                                                                                                                                                                                                                                                                                                                                                                                                                                       |                                                                                                                                                                                                                                                                                                                                                                         |                          |                          |                          |                          |  |  |  |                                     |                          |                          |                          |                          |                          |                          |    |  |  |  |  |  |  |  |                          |                          |                          |                          |                          |                          |                          |     |  |  |  |  |  |  |  |                          |                          |                          |                          |                          |                          |                          |                                                                                                                               |                                                                                                                       |
|          | <input checked="" type="checkbox"/>                                                                                                                                                                                                                                                                                                                                                                                            | <input type="checkbox"/>                                                                                                                                                                                                                                                                                                                                                                                                                                                                                                                                                                                                                                                                                                                                                                                                                                                                                                                                                                                                                                                                                                                                              | <input type="checkbox"/>                                                                                                                                                                                                                                                                                                                                                | <input type="checkbox"/> | <input type="checkbox"/> | <input type="checkbox"/> | <input type="checkbox"/> |  |  |  |                                     |                          |                          |                          |                          |                          |                          |    |  |  |  |  |  |  |  |                          |                          |                          |                          |                          |                          |                          |     |  |  |  |  |  |  |  |                          |                          |                          |                          |                          |                          |                          |                                                                                                                               |                                                                                                                       |
| II       |                                                                                                                                                                                                                                                                                                                                                                                                                                |                                                                                                                                                                                                                                                                                                                                                                                                                                                                                                                                                                                                                                                                                                                                                                                                                                                                                                                                                                                                                                                                                                                                                                       |                                                                                                                                                                                                                                                                                                                                                                         |                          |                          |                          |                          |  |  |  |                                     |                          |                          |                          |                          |                          |                          |    |  |  |  |  |  |  |  |                          |                          |                          |                          |                          |                          |                          |     |  |  |  |  |  |  |  |                          |                          |                          |                          |                          |                          |                          |                                                                                                                               |                                                                                                                       |
|          | <input type="checkbox"/>                                                                                                                                                                                                                                                                                                                                                                                                       | <input type="checkbox"/>                                                                                                                                                                                                                                                                                                                                                                                                                                                                                                                                                                                                                                                                                                                                                                                                                                                                                                                                                                                                                                                                                                                                              | <input type="checkbox"/>                                                                                                                                                                                                                                                                                                                                                | <input type="checkbox"/> | <input type="checkbox"/> | <input type="checkbox"/> | <input type="checkbox"/> |  |  |  |                                     |                          |                          |                          |                          |                          |                          |    |  |  |  |  |  |  |  |                          |                          |                          |                          |                          |                          |                          |     |  |  |  |  |  |  |  |                          |                          |                          |                          |                          |                          |                          |                                                                                                                               |                                                                                                                       |
| III      |                                                                                                                                                                                                                                                                                                                                                                                                                                |                                                                                                                                                                                                                                                                                                                                                                                                                                                                                                                                                                                                                                                                                                                                                                                                                                                                                                                                                                                                                                                                                                                                                                       |                                                                                                                                                                                                                                                                                                                                                                         |                          |                          |                          |                          |  |  |  |                                     |                          |                          |                          |                          |                          |                          |    |  |  |  |  |  |  |  |                          |                          |                          |                          |                          |                          |                          |     |  |  |  |  |  |  |  |                          |                          |                          |                          |                          |                          |                          |                                                                                                                               |                                                                                                                       |
|          | <input type="checkbox"/>                                                                                                                                                                                                                                                                                                                                                                                                       | <input type="checkbox"/>                                                                                                                                                                                                                                                                                                                                                                                                                                                                                                                                                                                                                                                                                                                                                                                                                                                                                                                                                                                                                                                                                                                                              | <input type="checkbox"/>                                                                                                                                                                                                                                                                                                                                                | <input type="checkbox"/> | <input type="checkbox"/> | <input type="checkbox"/> | <input type="checkbox"/> |  |  |  |                                     |                          |                          |                          |                          |                          |                          |    |  |  |  |  |  |  |  |                          |                          |                          |                          |                          |                          |                          |     |  |  |  |  |  |  |  |                          |                          |                          |                          |                          |                          |                          |                                                                                                                               |                                                                                                                       |

|     |                                            |                                                                                                                                                                                                                                                                                                                                                                                                                                                                                                                                                                                                                                                                                                                                                |   |  |  |  |  |  |  |  |  |  |  |  |  |  |    |  |  |  |  |  |  |  |  |  |  |  |  |  |     |  |  |  |  |  |  |  |  |  |  |  |  |  |                                                                                                                               |                                                                                                                       |
|-----|--------------------------------------------|------------------------------------------------------------------------------------------------------------------------------------------------------------------------------------------------------------------------------------------------------------------------------------------------------------------------------------------------------------------------------------------------------------------------------------------------------------------------------------------------------------------------------------------------------------------------------------------------------------------------------------------------------------------------------------------------------------------------------------------------|---|--|--|--|--|--|--|--|--|--|--|--|--|--|----|--|--|--|--|--|--|--|--|--|--|--|--|--|-----|--|--|--|--|--|--|--|--|--|--|--|--|--|-------------------------------------------------------------------------------------------------------------------------------|-----------------------------------------------------------------------------------------------------------------------|
| 5   | <b>Date of observation</b><br><br>15.03.17 | <b>Phenophase</b><br><table border="1" style="width: 100%; border-collapse: collapse;"> <tr> <td style="width: 20px; text-align: center;">I</td> <td></td> <td></td> <td></td> <td></td> <td></td> <td></td> </tr> <tr> <td></td> <td style="background-color: black;"></td> <td></td> <td></td> <td></td> <td></td> <td></td> </tr> <tr> <td style="text-align: center;">II</td> <td></td> <td></td> <td></td> <td></td> <td></td> <td></td> </tr> <tr> <td></td> <td></td> <td></td> <td></td> <td></td> <td></td> <td></td> </tr> <tr> <td style="text-align: center;">III</td> <td></td> <td></td> <td></td> <td></td> <td></td> <td></td> </tr> <tr> <td></td> <td></td> <td></td> <td></td> <td></td> <td></td> <td></td> </tr> </table> | I |  |  |  |  |  |  |  |  |  |  |  |  |  | II |  |  |  |  |  |  |  |  |  |  |  |  |  | III |  |  |  |  |  |  |  |  |  |  |  |  |  | <b>Photo of the entire object</b><br><br>   | <b>Photos of details</b><br><br>   |
| I   |                                            |                                                                                                                                                                                                                                                                                                                                                                                                                                                                                                                                                                                                                                                                                                                                                |   |  |  |  |  |  |  |  |  |  |  |  |  |  |    |  |  |  |  |  |  |  |  |  |  |  |  |  |     |  |  |  |  |  |  |  |  |  |  |  |  |  |                                                                                                                               |                                                                                                                       |
|     |                                            |                                                                                                                                                                                                                                                                                                                                                                                                                                                                                                                                                                                                                                                                                                                                                |   |  |  |  |  |  |  |  |  |  |  |  |  |  |    |  |  |  |  |  |  |  |  |  |  |  |  |  |     |  |  |  |  |  |  |  |  |  |  |  |  |  |                                                                                                                               |                                                                                                                       |
| II  |                                            |                                                                                                                                                                                                                                                                                                                                                                                                                                                                                                                                                                                                                                                                                                                                                |   |  |  |  |  |  |  |  |  |  |  |  |  |  |    |  |  |  |  |  |  |  |  |  |  |  |  |  |     |  |  |  |  |  |  |  |  |  |  |  |  |  |                                                                                                                               |                                                                                                                       |
|     |                                            |                                                                                                                                                                                                                                                                                                                                                                                                                                                                                                                                                                                                                                                                                                                                                |   |  |  |  |  |  |  |  |  |  |  |  |  |  |    |  |  |  |  |  |  |  |  |  |  |  |  |  |     |  |  |  |  |  |  |  |  |  |  |  |  |  |                                                                                                                               |                                                                                                                       |
| III |                                            |                                                                                                                                                                                                                                                                                                                                                                                                                                                                                                                                                                                                                                                                                                                                                |   |  |  |  |  |  |  |  |  |  |  |  |  |  |    |  |  |  |  |  |  |  |  |  |  |  |  |  |     |  |  |  |  |  |  |  |  |  |  |  |  |  |                                                                                                                               |                                                                                                                       |
|     |                                            |                                                                                                                                                                                                                                                                                                                                                                                                                                                                                                                                                                                                                                                                                                                                                |   |  |  |  |  |  |  |  |  |  |  |  |  |  |    |  |  |  |  |  |  |  |  |  |  |  |  |  |     |  |  |  |  |  |  |  |  |  |  |  |  |  |                                                                                                                               |                                                                                                                       |
|     |                                            | Notes: none                                                                                                                                                                                                                                                                                                                                                                                                                                                                                                                                                                                                                                                                                                                                    |   |  |  |  |  |  |  |  |  |  |  |  |  |  |    |  |  |  |  |  |  |  |  |  |  |  |  |  |     |  |  |  |  |  |  |  |  |  |  |  |  |  |                                                                                                                               |                                                                                                                       |
| 6   | <b>Date of observation</b><br><br>24.03.17 | <b>Phenophase</b><br><table border="1" style="width: 100%; border-collapse: collapse;"> <tr> <td style="width: 20px; text-align: center;">I</td> <td></td> <td></td> <td></td> <td></td> <td></td> <td></td> </tr> <tr> <td></td> <td style="background-color: black;"></td> <td></td> <td></td> <td></td> <td></td> <td></td> </tr> <tr> <td style="text-align: center;">II</td> <td></td> <td></td> <td></td> <td></td> <td></td> <td></td> </tr> <tr> <td></td> <td></td> <td></td> <td></td> <td></td> <td></td> <td></td> </tr> <tr> <td style="text-align: center;">III</td> <td></td> <td></td> <td></td> <td></td> <td></td> <td></td> </tr> <tr> <td></td> <td></td> <td></td> <td></td> <td></td> <td></td> <td></td> </tr> </table> | I |  |  |  |  |  |  |  |  |  |  |  |  |  | II |  |  |  |  |  |  |  |  |  |  |  |  |  | III |  |  |  |  |  |  |  |  |  |  |  |  |  | <b>Photo of the entire object</b><br><br>  | <b>Photos of details</b><br><br>  |
| I   |                                            |                                                                                                                                                                                                                                                                                                                                                                                                                                                                                                                                                                                                                                                                                                                                                |   |  |  |  |  |  |  |  |  |  |  |  |  |  |    |  |  |  |  |  |  |  |  |  |  |  |  |  |     |  |  |  |  |  |  |  |  |  |  |  |  |  |                                                                                                                               |                                                                                                                       |
|     |                                            |                                                                                                                                                                                                                                                                                                                                                                                                                                                                                                                                                                                                                                                                                                                                                |   |  |  |  |  |  |  |  |  |  |  |  |  |  |    |  |  |  |  |  |  |  |  |  |  |  |  |  |     |  |  |  |  |  |  |  |  |  |  |  |  |  |                                                                                                                               |                                                                                                                       |
| II  |                                            |                                                                                                                                                                                                                                                                                                                                                                                                                                                                                                                                                                                                                                                                                                                                                |   |  |  |  |  |  |  |  |  |  |  |  |  |  |    |  |  |  |  |  |  |  |  |  |  |  |  |  |     |  |  |  |  |  |  |  |  |  |  |  |  |  |                                                                                                                               |                                                                                                                       |
|     |                                            |                                                                                                                                                                                                                                                                                                                                                                                                                                                                                                                                                                                                                                                                                                                                                |   |  |  |  |  |  |  |  |  |  |  |  |  |  |    |  |  |  |  |  |  |  |  |  |  |  |  |  |     |  |  |  |  |  |  |  |  |  |  |  |  |  |                                                                                                                               |                                                                                                                       |
| III |                                            |                                                                                                                                                                                                                                                                                                                                                                                                                                                                                                                                                                                                                                                                                                                                                |   |  |  |  |  |  |  |  |  |  |  |  |  |  |    |  |  |  |  |  |  |  |  |  |  |  |  |  |     |  |  |  |  |  |  |  |  |  |  |  |  |  |                                                                                                                               |                                                                                                                       |
|     |                                            |                                                                                                                                                                                                                                                                                                                                                                                                                                                                                                                                                                                                                                                                                                                                                |   |  |  |  |  |  |  |  |  |  |  |  |  |  |    |  |  |  |  |  |  |  |  |  |  |  |  |  |     |  |  |  |  |  |  |  |  |  |  |  |  |  |                                                                                                                               |                                                                                                                       |
|     |                                            | Notes: none                                                                                                                                                                                                                                                                                                                                                                                                                                                                                                                                                                                                                                                                                                                                    |   |  |  |  |  |  |  |  |  |  |  |  |  |  |    |  |  |  |  |  |  |  |  |  |  |  |  |  |     |  |  |  |  |  |  |  |  |  |  |  |  |  |                                                                                                                               |                                                                                                                       |
| 7   | <b>Date of observation</b><br><br>31.03.17 | <b>Phenophase</b><br><table border="1" style="width: 100%; border-collapse: collapse;"> <tr> <td style="width: 20px; text-align: center;">I</td> <td></td> <td></td> <td></td> <td></td> <td></td> <td></td> </tr> <tr> <td></td> <td></td> <td style="background-color: black;"></td> <td></td> <td></td> <td></td> <td></td> </tr> <tr> <td style="text-align: center;">II</td> <td></td> <td></td> <td></td> <td></td> <td></td> <td></td> </tr> <tr> <td></td> <td></td> <td></td> <td></td> <td></td> <td></td> <td></td> </tr> <tr> <td style="text-align: center;">III</td> <td></td> <td></td> <td></td> <td></td> <td></td> <td></td> </tr> <tr> <td></td> <td></td> <td></td> <td></td> <td></td> <td></td> <td></td> </tr> </table> | I |  |  |  |  |  |  |  |  |  |  |  |  |  | II |  |  |  |  |  |  |  |  |  |  |  |  |  | III |  |  |  |  |  |  |  |  |  |  |  |  |  | <b>Photo of the entire object</b><br><br> | <b>Photos of details</b><br><br> |
| I   |                                            |                                                                                                                                                                                                                                                                                                                                                                                                                                                                                                                                                                                                                                                                                                                                                |   |  |  |  |  |  |  |  |  |  |  |  |  |  |    |  |  |  |  |  |  |  |  |  |  |  |  |  |     |  |  |  |  |  |  |  |  |  |  |  |  |  |                                                                                                                               |                                                                                                                       |
|     |                                            |                                                                                                                                                                                                                                                                                                                                                                                                                                                                                                                                                                                                                                                                                                                                                |   |  |  |  |  |  |  |  |  |  |  |  |  |  |    |  |  |  |  |  |  |  |  |  |  |  |  |  |     |  |  |  |  |  |  |  |  |  |  |  |  |  |                                                                                                                               |                                                                                                                       |
| II  |                                            |                                                                                                                                                                                                                                                                                                                                                                                                                                                                                                                                                                                                                                                                                                                                                |   |  |  |  |  |  |  |  |  |  |  |  |  |  |    |  |  |  |  |  |  |  |  |  |  |  |  |  |     |  |  |  |  |  |  |  |  |  |  |  |  |  |                                                                                                                               |                                                                                                                       |
|     |                                            |                                                                                                                                                                                                                                                                                                                                                                                                                                                                                                                                                                                                                                                                                                                                                |   |  |  |  |  |  |  |  |  |  |  |  |  |  |    |  |  |  |  |  |  |  |  |  |  |  |  |  |     |  |  |  |  |  |  |  |  |  |  |  |  |  |                                                                                                                               |                                                                                                                       |
| III |                                            |                                                                                                                                                                                                                                                                                                                                                                                                                                                                                                                                                                                                                                                                                                                                                |   |  |  |  |  |  |  |  |  |  |  |  |  |  |    |  |  |  |  |  |  |  |  |  |  |  |  |  |     |  |  |  |  |  |  |  |  |  |  |  |  |  |                                                                                                                               |                                                                                                                       |
|     |                                            |                                                                                                                                                                                                                                                                                                                                                                                                                                                                                                                                                                                                                                                                                                                                                |   |  |  |  |  |  |  |  |  |  |  |  |  |  |    |  |  |  |  |  |  |  |  |  |  |  |  |  |     |  |  |  |  |  |  |  |  |  |  |  |  |  |                                                                                                                               |                                                                                                                       |
|     |                                            | Notes: none                                                                                                                                                                                                                                                                                                                                                                                                                                                                                                                                                                                                                                                                                                                                    |   |  |  |  |  |  |  |  |  |  |  |  |  |  |    |  |  |  |  |  |  |  |  |  |  |  |  |  |     |  |  |  |  |  |  |  |  |  |  |  |  |  |                                                                                                                               |                                                                                                                       |

|     |                                            |                                                                                                                                                                                                                                                                                                                                                                                                                                                                                                                                                                                                                                                                                                                                                                                                                                                                    |                                   |                          |  |  |  |  |  |  |  |  |  |  |  |  |    |  |  |  |  |  |  |  |  |  |  |  |  |  |     |  |  |  |  |  |  |  |  |  |  |  |                                                                                                                           |                                                                                                                   |
|-----|--------------------------------------------|--------------------------------------------------------------------------------------------------------------------------------------------------------------------------------------------------------------------------------------------------------------------------------------------------------------------------------------------------------------------------------------------------------------------------------------------------------------------------------------------------------------------------------------------------------------------------------------------------------------------------------------------------------------------------------------------------------------------------------------------------------------------------------------------------------------------------------------------------------------------|-----------------------------------|--------------------------|--|--|--|--|--|--|--|--|--|--|--|--|----|--|--|--|--|--|--|--|--|--|--|--|--|--|-----|--|--|--|--|--|--|--|--|--|--|--|---------------------------------------------------------------------------------------------------------------------------|-------------------------------------------------------------------------------------------------------------------|
| 8   | <b>Date of observation</b><br><br>7.04.17  | <b>Phenophase</b><br><table border="1" style="width: 100%; text-align: center;"> <tr> <td style="width: 20px;">I</td> <td></td> <td></td> <td></td> <td></td> <td></td> <td></td> </tr> <tr> <td></td> <td></td> <td></td> <td style="background-color: black;"></td> <td></td> <td></td> <td></td> </tr> </table><br><table border="1" style="width: 100%; text-align: center;"> <tr> <td style="width: 20px;">II</td> <td></td> <td></td> <td></td> <td></td> <td></td> <td></td> </tr> <tr> <td></td> <td style="background-color: black;"></td> <td></td> <td></td> <td></td> <td></td> <td></td> </tr> </table><br><table border="1" style="width: 100%; text-align: center;"> <tr> <td style="width: 20px;">III</td> <td></td> <td></td> <td></td> <td></td> <td></td> </tr> <tr> <td></td> <td></td> <td></td> <td></td> <td></td> <td></td> </tr> </table> | I                                 |                          |  |  |  |  |  |  |  |  |  |  |  |  | II |  |  |  |  |  |  |  |  |  |  |  |  |  | III |  |  |  |  |  |  |  |  |  |  |  | <b>Photo of the entire object</b><br>   | <b>Photos of details</b><br>   |
| I   |                                            |                                                                                                                                                                                                                                                                                                                                                                                                                                                                                                                                                                                                                                                                                                                                                                                                                                                                    |                                   |                          |  |  |  |  |  |  |  |  |  |  |  |  |    |  |  |  |  |  |  |  |  |  |  |  |  |  |     |  |  |  |  |  |  |  |  |  |  |  |                                                                                                                           |                                                                                                                   |
|     |                                            |                                                                                                                                                                                                                                                                                                                                                                                                                                                                                                                                                                                                                                                                                                                                                                                                                                                                    |                                   |                          |  |  |  |  |  |  |  |  |  |  |  |  |    |  |  |  |  |  |  |  |  |  |  |  |  |  |     |  |  |  |  |  |  |  |  |  |  |  |                                                                                                                           |                                                                                                                   |
| II  |                                            |                                                                                                                                                                                                                                                                                                                                                                                                                                                                                                                                                                                                                                                                                                                                                                                                                                                                    |                                   |                          |  |  |  |  |  |  |  |  |  |  |  |  |    |  |  |  |  |  |  |  |  |  |  |  |  |  |     |  |  |  |  |  |  |  |  |  |  |  |                                                                                                                           |                                                                                                                   |
|     |                                            |                                                                                                                                                                                                                                                                                                                                                                                                                                                                                                                                                                                                                                                                                                                                                                                                                                                                    |                                   |                          |  |  |  |  |  |  |  |  |  |  |  |  |    |  |  |  |  |  |  |  |  |  |  |  |  |  |     |  |  |  |  |  |  |  |  |  |  |  |                                                                                                                           |                                                                                                                   |
| III |                                            |                                                                                                                                                                                                                                                                                                                                                                                                                                                                                                                                                                                                                                                                                                                                                                                                                                                                    |                                   |                          |  |  |  |  |  |  |  |  |  |  |  |  |    |  |  |  |  |  |  |  |  |  |  |  |  |  |     |  |  |  |  |  |  |  |  |  |  |  |                                                                                                                           |                                                                                                                   |
|     |                                            |                                                                                                                                                                                                                                                                                                                                                                                                                                                                                                                                                                                                                                                                                                                                                                                                                                                                    |                                   |                          |  |  |  |  |  |  |  |  |  |  |  |  |    |  |  |  |  |  |  |  |  |  |  |  |  |  |     |  |  |  |  |  |  |  |  |  |  |  |                                                                                                                           |                                                                                                                   |
|     |                                            | Notes: none                                                                                                                                                                                                                                                                                                                                                                                                                                                                                                                                                                                                                                                                                                                                                                                                                                                        |                                   |                          |  |  |  |  |  |  |  |  |  |  |  |  |    |  |  |  |  |  |  |  |  |  |  |  |  |  |     |  |  |  |  |  |  |  |  |  |  |  |                                                                                                                           |                                                                                                                   |
| 9   | <b>Date of observation</b><br><br>14.04.17 | <b>Phenophase</b><br><table border="1" style="width: 100%; text-align: center;"> <tr> <td style="width: 20px;">I</td> <td></td> <td></td> <td></td> <td></td> <td></td> <td></td> </tr> <tr> <td></td> <td></td> <td></td> <td style="background-color: black;"></td> <td></td> <td></td> <td></td> </tr> </table><br><table border="1" style="width: 100%; text-align: center;"> <tr> <td style="width: 20px;">II</td> <td></td> <td></td> <td></td> <td></td> <td></td> <td></td> </tr> <tr> <td></td> <td style="background-color: black;"></td> <td></td> <td></td> <td></td> <td></td> <td></td> </tr> </table><br><table border="1" style="width: 100%; text-align: center;"> <tr> <td style="width: 20px;">III</td> <td></td> <td></td> <td></td> <td></td> <td></td> </tr> <tr> <td></td> <td></td> <td></td> <td></td> <td></td> <td></td> </tr> </table> | I                                 |                          |  |  |  |  |  |  |  |  |  |  |  |  | II |  |  |  |  |  |  |  |  |  |  |  |  |  | III |  |  |  |  |  |  |  |  |  |  |  | <b>Photo of the entire object</b><br>  | <b>Photos of details</b><br>  |
| I   |                                            |                                                                                                                                                                                                                                                                                                                                                                                                                                                                                                                                                                                                                                                                                                                                                                                                                                                                    |                                   |                          |  |  |  |  |  |  |  |  |  |  |  |  |    |  |  |  |  |  |  |  |  |  |  |  |  |  |     |  |  |  |  |  |  |  |  |  |  |  |                                                                                                                           |                                                                                                                   |
|     |                                            |                                                                                                                                                                                                                                                                                                                                                                                                                                                                                                                                                                                                                                                                                                                                                                                                                                                                    |                                   |                          |  |  |  |  |  |  |  |  |  |  |  |  |    |  |  |  |  |  |  |  |  |  |  |  |  |  |     |  |  |  |  |  |  |  |  |  |  |  |                                                                                                                           |                                                                                                                   |
| II  |                                            |                                                                                                                                                                                                                                                                                                                                                                                                                                                                                                                                                                                                                                                                                                                                                                                                                                                                    |                                   |                          |  |  |  |  |  |  |  |  |  |  |  |  |    |  |  |  |  |  |  |  |  |  |  |  |  |  |     |  |  |  |  |  |  |  |  |  |  |  |                                                                                                                           |                                                                                                                   |
|     |                                            |                                                                                                                                                                                                                                                                                                                                                                                                                                                                                                                                                                                                                                                                                                                                                                                                                                                                    |                                   |                          |  |  |  |  |  |  |  |  |  |  |  |  |    |  |  |  |  |  |  |  |  |  |  |  |  |  |     |  |  |  |  |  |  |  |  |  |  |  |                                                                                                                           |                                                                                                                   |
| III |                                            |                                                                                                                                                                                                                                                                                                                                                                                                                                                                                                                                                                                                                                                                                                                                                                                                                                                                    |                                   |                          |  |  |  |  |  |  |  |  |  |  |  |  |    |  |  |  |  |  |  |  |  |  |  |  |  |  |     |  |  |  |  |  |  |  |  |  |  |  |                                                                                                                           |                                                                                                                   |
|     |                                            |                                                                                                                                                                                                                                                                                                                                                                                                                                                                                                                                                                                                                                                                                                                                                                                                                                                                    |                                   |                          |  |  |  |  |  |  |  |  |  |  |  |  |    |  |  |  |  |  |  |  |  |  |  |  |  |  |     |  |  |  |  |  |  |  |  |  |  |  |                                                                                                                           |                                                                                                                   |
|     |                                            | Notes: none                                                                                                                                                                                                                                                                                                                                                                                                                                                                                                                                                                                                                                                                                                                                                                                                                                                        |                                   |                          |  |  |  |  |  |  |  |  |  |  |  |  |    |  |  |  |  |  |  |  |  |  |  |  |  |  |     |  |  |  |  |  |  |  |  |  |  |  |                                                                                                                           |                                                                                                                   |
| 10  | <b>Date of observation</b><br><br>22.04.17 | <b>Phenophase</b><br><table border="1" style="width: 100%; text-align: center;"> <tr> <td style="width: 20px;">I</td> <td></td> <td></td> <td></td> <td></td> <td></td> <td></td> </tr> <tr> <td></td> <td></td> <td></td> <td style="background-color: black;"></td> <td></td> <td></td> <td></td> </tr> </table><br><table border="1" style="width: 100%; text-align: center;"> <tr> <td style="width: 20px;">II</td> <td></td> <td></td> <td></td> <td></td> <td></td> <td></td> </tr> <tr> <td></td> <td></td> <td style="background-color: black;"></td> <td></td> <td></td> <td></td> <td></td> </tr> </table><br><table border="1" style="width: 100%; text-align: center;"> <tr> <td style="width: 20px;">III</td> <td></td> <td></td> <td></td> <td></td> <td></td> </tr> <tr> <td></td> <td></td> <td></td> <td></td> <td></td> <td></td> </tr> </table> | I                                 |                          |  |  |  |  |  |  |  |  |  |  |  |  | II |  |  |  |  |  |  |  |  |  |  |  |  |  | III |  |  |  |  |  |  |  |  |  |  |  | <b>Photo of the entire object</b><br> | <b>Photos of details</b><br> |
| I   |                                            |                                                                                                                                                                                                                                                                                                                                                                                                                                                                                                                                                                                                                                                                                                                                                                                                                                                                    |                                   |                          |  |  |  |  |  |  |  |  |  |  |  |  |    |  |  |  |  |  |  |  |  |  |  |  |  |  |     |  |  |  |  |  |  |  |  |  |  |  |                                                                                                                           |                                                                                                                   |
|     |                                            |                                                                                                                                                                                                                                                                                                                                                                                                                                                                                                                                                                                                                                                                                                                                                                                                                                                                    |                                   |                          |  |  |  |  |  |  |  |  |  |  |  |  |    |  |  |  |  |  |  |  |  |  |  |  |  |  |     |  |  |  |  |  |  |  |  |  |  |  |                                                                                                                           |                                                                                                                   |
| II  |                                            |                                                                                                                                                                                                                                                                                                                                                                                                                                                                                                                                                                                                                                                                                                                                                                                                                                                                    |                                   |                          |  |  |  |  |  |  |  |  |  |  |  |  |    |  |  |  |  |  |  |  |  |  |  |  |  |  |     |  |  |  |  |  |  |  |  |  |  |  |                                                                                                                           |                                                                                                                   |
|     |                                            |                                                                                                                                                                                                                                                                                                                                                                                                                                                                                                                                                                                                                                                                                                                                                                                                                                                                    |                                   |                          |  |  |  |  |  |  |  |  |  |  |  |  |    |  |  |  |  |  |  |  |  |  |  |  |  |  |     |  |  |  |  |  |  |  |  |  |  |  |                                                                                                                           |                                                                                                                   |
| III |                                            |                                                                                                                                                                                                                                                                                                                                                                                                                                                                                                                                                                                                                                                                                                                                                                                                                                                                    |                                   |                          |  |  |  |  |  |  |  |  |  |  |  |  |    |  |  |  |  |  |  |  |  |  |  |  |  |  |     |  |  |  |  |  |  |  |  |  |  |  |                                                                                                                           |                                                                                                                   |
|     |                                            |                                                                                                                                                                                                                                                                                                                                                                                                                                                                                                                                                                                                                                                                                                                                                                                                                                                                    |                                   |                          |  |  |  |  |  |  |  |  |  |  |  |  |    |  |  |  |  |  |  |  |  |  |  |  |  |  |     |  |  |  |  |  |  |  |  |  |  |  |                                                                                                                           |                                                                                                                   |
|     |                                            | Notes: none                                                                                                                                                                                                                                                                                                                                                                                                                                                                                                                                                                                                                                                                                                                                                                                                                                                        |                                   |                          |  |  |  |  |  |  |  |  |  |  |  |  |    |  |  |  |  |  |  |  |  |  |  |  |  |  |     |  |  |  |  |  |  |  |  |  |  |  |                                                                                                                           |                                                                                                                   |
| 11  | <b>Date of observation</b>                 | <b>Phenophase</b>                                                                                                                                                                                                                                                                                                                                                                                                                                                                                                                                                                                                                                                                                                                                                                                                                                                  | <b>Photo of the entire object</b> | <b>Photos of details</b> |  |  |  |  |  |  |  |  |  |  |  |  |    |  |  |  |  |  |  |  |  |  |  |  |  |  |     |  |  |  |  |  |  |  |  |  |  |  |                                                                                                                           |                                                                                                                   |

|                                                          |                                                                                                                                                                                                                                                                                                                                                                                                                                                                                                                                                                                                                       |  |  |  |  |  |  |  |  |  |  |  |  |  |  |  |  |  |  |  |  |  |  |  |  |  |  |  |  |  |  |  |  |  |  |  |  |  |  |  |  |                                                                                                                        |                                                                                                                |
|----------------------------------------------------------|-----------------------------------------------------------------------------------------------------------------------------------------------------------------------------------------------------------------------------------------------------------------------------------------------------------------------------------------------------------------------------------------------------------------------------------------------------------------------------------------------------------------------------------------------------------------------------------------------------------------------|--|--|--|--|--|--|--|--|--|--|--|--|--|--|--|--|--|--|--|--|--|--|--|--|--|--|--|--|--|--|--|--|--|--|--|--|--|--|--|--|------------------------------------------------------------------------------------------------------------------------|----------------------------------------------------------------------------------------------------------------|
| <p>30.04.17</p>                                          | <p>I</p> <table border="1"> <tr> <td></td> <td></td> <td></td> <td></td> <td></td> <td></td> <td></td> </tr> <tr> <td></td> <td></td> <td></td> <td></td> <td></td> <td></td> <td></td> </tr> </table> <p>II</p> <table border="1"> <tr> <td></td> <td></td> <td></td> <td></td> <td></td> <td></td> <td></td> </tr> <tr> <td></td> <td></td> <td></td> <td></td> <td></td> <td></td> <td></td> </tr> </table> <p>III</p> <table border="1"> <tr> <td></td> <td></td> <td></td> <td></td> <td></td> <td></td> </tr> <tr> <td></td> <td></td> <td></td> <td></td> <td></td> <td></td> </tr> </table>                   |  |  |  |  |  |  |  |  |  |  |  |  |  |  |  |  |  |  |  |  |  |  |  |  |  |  |  |  |  |  |  |  |  |  |  |  |  |  |  |  |                                      |                             |
|                                                          |                                                                                                                                                                                                                                                                                                                                                                                                                                                                                                                                                                                                                       |  |  |  |  |  |  |  |  |  |  |  |  |  |  |  |  |  |  |  |  |  |  |  |  |  |  |  |  |  |  |  |  |  |  |  |  |  |  |  |  |                                                                                                                        |                                                                                                                |
|                                                          |                                                                                                                                                                                                                                                                                                                                                                                                                                                                                                                                                                                                                       |  |  |  |  |  |  |  |  |  |  |  |  |  |  |  |  |  |  |  |  |  |  |  |  |  |  |  |  |  |  |  |  |  |  |  |  |  |  |  |  |                                                                                                                        |                                                                                                                |
|                                                          |                                                                                                                                                                                                                                                                                                                                                                                                                                                                                                                                                                                                                       |  |  |  |  |  |  |  |  |  |  |  |  |  |  |  |  |  |  |  |  |  |  |  |  |  |  |  |  |  |  |  |  |  |  |  |  |  |  |  |  |                                                                                                                        |                                                                                                                |
|                                                          |                                                                                                                                                                                                                                                                                                                                                                                                                                                                                                                                                                                                                       |  |  |  |  |  |  |  |  |  |  |  |  |  |  |  |  |  |  |  |  |  |  |  |  |  |  |  |  |  |  |  |  |  |  |  |  |  |  |  |  |                                                                                                                        |                                                                                                                |
|                                                          |                                                                                                                                                                                                                                                                                                                                                                                                                                                                                                                                                                                                                       |  |  |  |  |  |  |  |  |  |  |  |  |  |  |  |  |  |  |  |  |  |  |  |  |  |  |  |  |  |  |  |  |  |  |  |  |  |  |  |  |                                                                                                                        |                                                                                                                |
|                                                          |                                                                                                                                                                                                                                                                                                                                                                                                                                                                                                                                                                                                                       |  |  |  |  |  |  |  |  |  |  |  |  |  |  |  |  |  |  |  |  |  |  |  |  |  |  |  |  |  |  |  |  |  |  |  |  |  |  |  |  |                                                                                                                        |                                                                                                                |
| <p>Notes: flowering begins at the bottom of the tree</p> |                                                                                                                                                                                                                                                                                                                                                                                                                                                                                                                                                                                                                       |  |  |  |  |  |  |  |  |  |  |  |  |  |  |  |  |  |  |  |  |  |  |  |  |  |  |  |  |  |  |  |  |  |  |  |  |  |  |  |  |                                                                                                                        |                                                                                                                |
| <p>12</p> <p>Date of observation</p> <p>07.05.17</p>     | <p>Phenophase</p> <p>I</p> <table border="1"> <tr> <td></td> <td></td> <td></td> <td></td> <td></td> <td></td> <td></td> </tr> <tr> <td></td> <td></td> <td></td> <td></td> <td></td> <td></td> <td></td> </tr> </table> <p>II</p> <table border="1"> <tr> <td></td> <td></td> <td></td> <td></td> <td></td> <td></td> <td></td> </tr> <tr> <td></td> <td></td> <td></td> <td></td> <td></td> <td></td> <td></td> </tr> </table> <p>III</p> <table border="1"> <tr> <td></td> <td></td> <td></td> <td></td> <td></td> <td></td> </tr> <tr> <td></td> <td></td> <td></td> <td></td> <td></td> <td></td> </tr> </table> |  |  |  |  |  |  |  |  |  |  |  |  |  |  |  |  |  |  |  |  |  |  |  |  |  |  |  |  |  |  |  |  |  |  |  |  |  |  |  |  | <p>Photo of the entire object</p>   | <p>Photos of details</p>   |
|                                                          |                                                                                                                                                                                                                                                                                                                                                                                                                                                                                                                                                                                                                       |  |  |  |  |  |  |  |  |  |  |  |  |  |  |  |  |  |  |  |  |  |  |  |  |  |  |  |  |  |  |  |  |  |  |  |  |  |  |  |  |                                                                                                                        |                                                                                                                |
|                                                          |                                                                                                                                                                                                                                                                                                                                                                                                                                                                                                                                                                                                                       |  |  |  |  |  |  |  |  |  |  |  |  |  |  |  |  |  |  |  |  |  |  |  |  |  |  |  |  |  |  |  |  |  |  |  |  |  |  |  |  |                                                                                                                        |                                                                                                                |
|                                                          |                                                                                                                                                                                                                                                                                                                                                                                                                                                                                                                                                                                                                       |  |  |  |  |  |  |  |  |  |  |  |  |  |  |  |  |  |  |  |  |  |  |  |  |  |  |  |  |  |  |  |  |  |  |  |  |  |  |  |  |                                                                                                                        |                                                                                                                |
|                                                          |                                                                                                                                                                                                                                                                                                                                                                                                                                                                                                                                                                                                                       |  |  |  |  |  |  |  |  |  |  |  |  |  |  |  |  |  |  |  |  |  |  |  |  |  |  |  |  |  |  |  |  |  |  |  |  |  |  |  |  |                                                                                                                        |                                                                                                                |
|                                                          |                                                                                                                                                                                                                                                                                                                                                                                                                                                                                                                                                                                                                       |  |  |  |  |  |  |  |  |  |  |  |  |  |  |  |  |  |  |  |  |  |  |  |  |  |  |  |  |  |  |  |  |  |  |  |  |  |  |  |  |                                                                                                                        |                                                                                                                |
|                                                          |                                                                                                                                                                                                                                                                                                                                                                                                                                                                                                                                                                                                                       |  |  |  |  |  |  |  |  |  |  |  |  |  |  |  |  |  |  |  |  |  |  |  |  |  |  |  |  |  |  |  |  |  |  |  |  |  |  |  |  |                                                                                                                        |                                                                                                                |
| <p>Notes: none</p>                                       |                                                                                                                                                                                                                                                                                                                                                                                                                                                                                                                                                                                                                       |  |  |  |  |  |  |  |  |  |  |  |  |  |  |  |  |  |  |  |  |  |  |  |  |  |  |  |  |  |  |  |  |  |  |  |  |  |  |  |  |                                                                                                                        |                                                                                                                |
| <p>13</p> <p>Date of observation</p> <p>14.05.17</p>     | <p>Phenophase</p> <p>I</p> <table border="1"> <tr> <td></td> <td></td> <td></td> <td></td> <td></td> <td></td> <td></td> </tr> <tr> <td></td> <td></td> <td></td> <td></td> <td></td> <td></td> <td></td> </tr> </table> <p>II</p> <table border="1"> <tr> <td></td> <td></td> <td></td> <td></td> <td></td> <td></td> <td></td> </tr> <tr> <td></td> <td></td> <td></td> <td></td> <td></td> <td></td> <td></td> </tr> </table> <p>III</p> <table border="1"> <tr> <td></td> <td></td> <td></td> <td></td> <td></td> <td></td> </tr> <tr> <td></td> <td></td> <td></td> <td></td> <td></td> <td></td> </tr> </table> |  |  |  |  |  |  |  |  |  |  |  |  |  |  |  |  |  |  |  |  |  |  |  |  |  |  |  |  |  |  |  |  |  |  |  |  |  |  |  |  | <p>Photo of the entire object</p>  | <p>Photos of details</p>  |
|                                                          |                                                                                                                                                                                                                                                                                                                                                                                                                                                                                                                                                                                                                       |  |  |  |  |  |  |  |  |  |  |  |  |  |  |  |  |  |  |  |  |  |  |  |  |  |  |  |  |  |  |  |  |  |  |  |  |  |  |  |  |                                                                                                                        |                                                                                                                |
|                                                          |                                                                                                                                                                                                                                                                                                                                                                                                                                                                                                                                                                                                                       |  |  |  |  |  |  |  |  |  |  |  |  |  |  |  |  |  |  |  |  |  |  |  |  |  |  |  |  |  |  |  |  |  |  |  |  |  |  |  |  |                                                                                                                        |                                                                                                                |
|                                                          |                                                                                                                                                                                                                                                                                                                                                                                                                                                                                                                                                                                                                       |  |  |  |  |  |  |  |  |  |  |  |  |  |  |  |  |  |  |  |  |  |  |  |  |  |  |  |  |  |  |  |  |  |  |  |  |  |  |  |  |                                                                                                                        |                                                                                                                |
|                                                          |                                                                                                                                                                                                                                                                                                                                                                                                                                                                                                                                                                                                                       |  |  |  |  |  |  |  |  |  |  |  |  |  |  |  |  |  |  |  |  |  |  |  |  |  |  |  |  |  |  |  |  |  |  |  |  |  |  |  |  |                                                                                                                        |                                                                                                                |
|                                                          |                                                                                                                                                                                                                                                                                                                                                                                                                                                                                                                                                                                                                       |  |  |  |  |  |  |  |  |  |  |  |  |  |  |  |  |  |  |  |  |  |  |  |  |  |  |  |  |  |  |  |  |  |  |  |  |  |  |  |  |                                                                                                                        |                                                                                                                |
|                                                          |                                                                                                                                                                                                                                                                                                                                                                                                                                                                                                                                                                                                                       |  |  |  |  |  |  |  |  |  |  |  |  |  |  |  |  |  |  |  |  |  |  |  |  |  |  |  |  |  |  |  |  |  |  |  |  |  |  |  |  |                                                                                                                        |                                                                                                                |
| <p>Notes: none</p>                                       |                                                                                                                                                                                                                                                                                                                                                                                                                                                                                                                                                                                                                       |  |  |  |  |  |  |  |  |  |  |  |  |  |  |  |  |  |  |  |  |  |  |  |  |  |  |  |  |  |  |  |  |  |  |  |  |  |  |  |  |                                                                                                                        |                                                                                                                |
| <p>14</p> <p>Date of observation</p> <p>21.05.17</p>     | <p>Phenophase</p> <p>I</p> <table border="1"> <tr> <td></td> <td></td> <td></td> <td></td> <td></td> <td></td> <td></td> </tr> <tr> <td></td> <td></td> <td></td> <td></td> <td></td> <td></td> <td></td> </tr> </table> <p>II</p> <table border="1"> <tr> <td></td> <td></td> <td></td> <td></td> <td></td> <td></td> <td></td> </tr> <tr> <td></td> <td></td> <td></td> <td></td> <td></td> <td></td> <td></td> </tr> </table> <p>III</p> <table border="1"> <tr> <td></td> <td></td> <td></td> <td></td> <td></td> <td></td> </tr> <tr> <td></td> <td></td> <td></td> <td></td> <td></td> <td></td> </tr> </table> |  |  |  |  |  |  |  |  |  |  |  |  |  |  |  |  |  |  |  |  |  |  |  |  |  |  |  |  |  |  |  |  |  |  |  |  |  |  |  |  | <p>Photo of the entire object</p>  | <p>Photos of details</p>  |
|                                                          |                                                                                                                                                                                                                                                                                                                                                                                                                                                                                                                                                                                                                       |  |  |  |  |  |  |  |  |  |  |  |  |  |  |  |  |  |  |  |  |  |  |  |  |  |  |  |  |  |  |  |  |  |  |  |  |  |  |  |  |                                                                                                                        |                                                                                                                |
|                                                          |                                                                                                                                                                                                                                                                                                                                                                                                                                                                                                                                                                                                                       |  |  |  |  |  |  |  |  |  |  |  |  |  |  |  |  |  |  |  |  |  |  |  |  |  |  |  |  |  |  |  |  |  |  |  |  |  |  |  |  |                                                                                                                        |                                                                                                                |
|                                                          |                                                                                                                                                                                                                                                                                                                                                                                                                                                                                                                                                                                                                       |  |  |  |  |  |  |  |  |  |  |  |  |  |  |  |  |  |  |  |  |  |  |  |  |  |  |  |  |  |  |  |  |  |  |  |  |  |  |  |  |                                                                                                                        |                                                                                                                |
|                                                          |                                                                                                                                                                                                                                                                                                                                                                                                                                                                                                                                                                                                                       |  |  |  |  |  |  |  |  |  |  |  |  |  |  |  |  |  |  |  |  |  |  |  |  |  |  |  |  |  |  |  |  |  |  |  |  |  |  |  |  |                                                                                                                        |                                                                                                                |
|                                                          |                                                                                                                                                                                                                                                                                                                                                                                                                                                                                                                                                                                                                       |  |  |  |  |  |  |  |  |  |  |  |  |  |  |  |  |  |  |  |  |  |  |  |  |  |  |  |  |  |  |  |  |  |  |  |  |  |  |  |  |                                                                                                                        |                                                                                                                |
|                                                          |                                                                                                                                                                                                                                                                                                                                                                                                                                                                                                                                                                                                                       |  |  |  |  |  |  |  |  |  |  |  |  |  |  |  |  |  |  |  |  |  |  |  |  |  |  |  |  |  |  |  |  |  |  |  |  |  |  |  |  |                                                                                                                        |                                                                                                                |
| <p>Notes: none</p>                                       |                                                                                                                                                                                                                                                                                                                                                                                                                                                                                                                                                                                                                       |  |  |  |  |  |  |  |  |  |  |  |  |  |  |  |  |  |  |  |  |  |  |  |  |  |  |  |  |  |  |  |  |  |  |  |  |  |  |  |  |                                                                                                                        |                                                                                                                |

|           |                                                   |                                                                                                                                                                                                                                                                                                                                                                                                                                                                                                                                                                                                      |   |  |  |  |  |  |  |  |  |  |  |  |  |    |  |  |  |  |  |  |  |  |  |  |  |  |                                          |                                 |  |  |  |  |  |  |  |  |  |  |  |                                                                                                                                                  |                                                                                                                       |
|-----------|---------------------------------------------------|------------------------------------------------------------------------------------------------------------------------------------------------------------------------------------------------------------------------------------------------------------------------------------------------------------------------------------------------------------------------------------------------------------------------------------------------------------------------------------------------------------------------------------------------------------------------------------------------------|---|--|--|--|--|--|--|--|--|--|--|--|--|----|--|--|--|--|--|--|--|--|--|--|--|--|------------------------------------------|---------------------------------|--|--|--|--|--|--|--|--|--|--|--|--------------------------------------------------------------------------------------------------------------------------------------------------|-----------------------------------------------------------------------------------------------------------------------|
| <p>15</p> | <p><b>Date of observation</b></p> <p>28.05.17</p> | <p><b>Phenophase</b></p> <table border="1" data-bbox="355 203 855 633"> <tr> <td rowspan="2">I</td> <td></td> <td></td> <td></td> <td></td> <td></td> <td></td> </tr> <tr> <td></td> <td></td> <td></td> <td></td> <td></td> <td></td> </tr> <tr> <td rowspan="2">II</td> <td></td> <td></td> <td></td> <td></td> <td></td> <td></td> </tr> <tr> <td></td> <td></td> <td></td> <td></td> <td></td> <td></td> </tr> <tr> <td rowspan="2">III</td> <td></td> <td></td> <td></td> <td></td> <td></td> <td></td> </tr> <tr> <td></td> <td></td> <td></td> <td></td> <td></td> <td></td> </tr> </table>   | I |  |  |  |  |  |  |  |  |  |  |  |  | II |  |  |  |  |  |  |  |  |  |  |  |  | III                                      |                                 |  |  |  |  |  |  |  |  |  |  |  | <p><b>Photo of the entire object</b></p>  <p>Notes: none</p>   | <p><b>Photos of details</b></p>    |
| I         |                                                   |                                                                                                                                                                                                                                                                                                                                                                                                                                                                                                                                                                                                      |   |  |  |  |  |  |  |  |  |  |  |  |  |    |  |  |  |  |  |  |  |  |  |  |  |  |                                          |                                 |  |  |  |  |  |  |  |  |  |  |  |                                                                                                                                                  |                                                                                                                       |
|           |                                                   |                                                                                                                                                                                                                                                                                                                                                                                                                                                                                                                                                                                                      |   |  |  |  |  |  |  |  |  |  |  |  |  |    |  |  |  |  |  |  |  |  |  |  |  |  |                                          |                                 |  |  |  |  |  |  |  |  |  |  |  |                                                                                                                                                  |                                                                                                                       |
| II        |                                                   |                                                                                                                                                                                                                                                                                                                                                                                                                                                                                                                                                                                                      |   |  |  |  |  |  |  |  |  |  |  |  |  |    |  |  |  |  |  |  |  |  |  |  |  |  |                                          |                                 |  |  |  |  |  |  |  |  |  |  |  |                                                                                                                                                  |                                                                                                                       |
|           |                                                   |                                                                                                                                                                                                                                                                                                                                                                                                                                                                                                                                                                                                      |   |  |  |  |  |  |  |  |  |  |  |  |  |    |  |  |  |  |  |  |  |  |  |  |  |  |                                          |                                 |  |  |  |  |  |  |  |  |  |  |  |                                                                                                                                                  |                                                                                                                       |
| III       |                                                   |                                                                                                                                                                                                                                                                                                                                                                                                                                                                                                                                                                                                      |   |  |  |  |  |  |  |  |  |  |  |  |  |    |  |  |  |  |  |  |  |  |  |  |  |  |                                          |                                 |  |  |  |  |  |  |  |  |  |  |  |                                                                                                                                                  |                                                                                                                       |
|           |                                                   |                                                                                                                                                                                                                                                                                                                                                                                                                                                                                                                                                                                                      |   |  |  |  |  |  |  |  |  |  |  |  |  |    |  |  |  |  |  |  |  |  |  |  |  |  |                                          |                                 |  |  |  |  |  |  |  |  |  |  |  |                                                                                                                                                  |                                                                                                                       |
| <p>16</p> | <p><b>Date of observation</b></p> <p>03.06.17</p> | <p><b>Phenophase</b></p> <table border="1" data-bbox="355 707 855 1137"> <tr> <td rowspan="2">I</td> <td></td> <td></td> <td></td> <td></td> <td></td> <td></td> </tr> <tr> <td></td> <td></td> <td></td> <td></td> <td></td> <td></td> </tr> <tr> <td rowspan="2">II</td> <td></td> <td></td> <td></td> <td></td> <td></td> <td></td> </tr> <tr> <td></td> <td></td> <td></td> <td></td> <td></td> <td></td> </tr> <tr> <td rowspan="2">III</td> <td></td> <td></td> <td></td> <td></td> <td></td> <td></td> </tr> <tr> <td></td> <td></td> <td></td> <td></td> <td></td> <td></td> </tr> </table>  | I |  |  |  |  |  |  |  |  |  |  |  |  | II |  |  |  |  |  |  |  |  |  |  |  |  | III                                      |                                 |  |  |  |  |  |  |  |  |  |  |  | <p><b>Photo of the entire object</b></p>  <p>Notes: none</p>  | <p><b>Photos of details</b></p>   |
| I         |                                                   |                                                                                                                                                                                                                                                                                                                                                                                                                                                                                                                                                                                                      |   |  |  |  |  |  |  |  |  |  |  |  |  |    |  |  |  |  |  |  |  |  |  |  |  |  |                                          |                                 |  |  |  |  |  |  |  |  |  |  |  |                                                                                                                                                  |                                                                                                                       |
|           |                                                   |                                                                                                                                                                                                                                                                                                                                                                                                                                                                                                                                                                                                      |   |  |  |  |  |  |  |  |  |  |  |  |  |    |  |  |  |  |  |  |  |  |  |  |  |  |                                          |                                 |  |  |  |  |  |  |  |  |  |  |  |                                                                                                                                                  |                                                                                                                       |
| II        |                                                   |                                                                                                                                                                                                                                                                                                                                                                                                                                                                                                                                                                                                      |   |  |  |  |  |  |  |  |  |  |  |  |  |    |  |  |  |  |  |  |  |  |  |  |  |  |                                          |                                 |  |  |  |  |  |  |  |  |  |  |  |                                                                                                                                                  |                                                                                                                       |
|           |                                                   |                                                                                                                                                                                                                                                                                                                                                                                                                                                                                                                                                                                                      |   |  |  |  |  |  |  |  |  |  |  |  |  |    |  |  |  |  |  |  |  |  |  |  |  |  |                                          |                                 |  |  |  |  |  |  |  |  |  |  |  |                                                                                                                                                  |                                                                                                                       |
| III       |                                                   |                                                                                                                                                                                                                                                                                                                                                                                                                                                                                                                                                                                                      |   |  |  |  |  |  |  |  |  |  |  |  |  |    |  |  |  |  |  |  |  |  |  |  |  |  |                                          |                                 |  |  |  |  |  |  |  |  |  |  |  |                                                                                                                                                  |                                                                                                                       |
|           |                                                   |                                                                                                                                                                                                                                                                                                                                                                                                                                                                                                                                                                                                      |   |  |  |  |  |  |  |  |  |  |  |  |  |    |  |  |  |  |  |  |  |  |  |  |  |  |                                          |                                 |  |  |  |  |  |  |  |  |  |  |  |                                                                                                                                                  |                                                                                                                       |
| <p>17</p> | <p><b>Date of observation</b></p> <p>10.06.17</p> | <p><b>Phenophase</b></p> <table border="1" data-bbox="355 1238 855 1668"> <tr> <td rowspan="2">I</td> <td></td> <td></td> <td></td> <td></td> <td></td> <td></td> </tr> <tr> <td></td> <td></td> <td></td> <td></td> <td></td> <td></td> </tr> <tr> <td rowspan="2">II</td> <td></td> <td></td> <td></td> <td></td> <td></td> <td></td> </tr> <tr> <td></td> <td></td> <td></td> <td></td> <td></td> <td></td> </tr> <tr> <td rowspan="2">III</td> <td></td> <td></td> <td></td> <td></td> <td></td> <td></td> </tr> <tr> <td></td> <td></td> <td></td> <td></td> <td></td> <td></td> </tr> </table> | I |  |  |  |  |  |  |  |  |  |  |  |  | II |  |  |  |  |  |  |  |  |  |  |  |  | III                                      |                                 |  |  |  |  |  |  |  |  |  |  |  | <p><b>Photo of the entire object</b></p>  <p>Notes: none</p> | <p><b>Photos of details</b></p>  |
| I         |                                                   |                                                                                                                                                                                                                                                                                                                                                                                                                                                                                                                                                                                                      |   |  |  |  |  |  |  |  |  |  |  |  |  |    |  |  |  |  |  |  |  |  |  |  |  |  |                                          |                                 |  |  |  |  |  |  |  |  |  |  |  |                                                                                                                                                  |                                                                                                                       |
|           |                                                   |                                                                                                                                                                                                                                                                                                                                                                                                                                                                                                                                                                                                      |   |  |  |  |  |  |  |  |  |  |  |  |  |    |  |  |  |  |  |  |  |  |  |  |  |  |                                          |                                 |  |  |  |  |  |  |  |  |  |  |  |                                                                                                                                                  |                                                                                                                       |
| II        |                                                   |                                                                                                                                                                                                                                                                                                                                                                                                                                                                                                                                                                                                      |   |  |  |  |  |  |  |  |  |  |  |  |  |    |  |  |  |  |  |  |  |  |  |  |  |  |                                          |                                 |  |  |  |  |  |  |  |  |  |  |  |                                                                                                                                                  |                                                                                                                       |
|           |                                                   |                                                                                                                                                                                                                                                                                                                                                                                                                                                                                                                                                                                                      |   |  |  |  |  |  |  |  |  |  |  |  |  |    |  |  |  |  |  |  |  |  |  |  |  |  |                                          |                                 |  |  |  |  |  |  |  |  |  |  |  |                                                                                                                                                  |                                                                                                                       |
| III       |                                                   |                                                                                                                                                                                                                                                                                                                                                                                                                                                                                                                                                                                                      |   |  |  |  |  |  |  |  |  |  |  |  |  |    |  |  |  |  |  |  |  |  |  |  |  |  |                                          |                                 |  |  |  |  |  |  |  |  |  |  |  |                                                                                                                                                  |                                                                                                                       |
|           |                                                   |                                                                                                                                                                                                                                                                                                                                                                                                                                                                                                                                                                                                      |   |  |  |  |  |  |  |  |  |  |  |  |  |    |  |  |  |  |  |  |  |  |  |  |  |  |                                          |                                 |  |  |  |  |  |  |  |  |  |  |  |                                                                                                                                                  |                                                                                                                       |
| <p>18</p> | <p><b>Date of observation</b></p> <p>17.06.17</p> | <p><b>Phenophase</b></p> <table border="1" data-bbox="355 1769 855 2051"> <tr> <td rowspan="2">I</td> <td></td> <td></td> <td></td> <td></td> <td></td> <td></td> </tr> <tr> <td></td> <td></td> <td></td> <td></td> <td></td> <td></td> </tr> <tr> <td rowspan="2">II</td> <td></td> <td></td> <td></td> <td></td> <td></td> <td></td> </tr> <tr> <td></td> <td></td> <td></td> <td></td> <td></td> <td></td> </tr> </table>                                                                                                                                                                        | I |  |  |  |  |  |  |  |  |  |  |  |  | II |  |  |  |  |  |  |  |  |  |  |  |  | <p><b>Photo of the entire object</b></p> | <p><b>Photos of details</b></p> |  |  |  |  |  |  |  |  |  |  |  |                                                                                                                                                  |                                                                                                                       |
| I         |                                                   |                                                                                                                                                                                                                                                                                                                                                                                                                                                                                                                                                                                                      |   |  |  |  |  |  |  |  |  |  |  |  |  |    |  |  |  |  |  |  |  |  |  |  |  |  |                                          |                                 |  |  |  |  |  |  |  |  |  |  |  |                                                                                                                                                  |                                                                                                                       |
|           |                                                   |                                                                                                                                                                                                                                                                                                                                                                                                                                                                                                                                                                                                      |   |  |  |  |  |  |  |  |  |  |  |  |  |    |  |  |  |  |  |  |  |  |  |  |  |  |                                          |                                 |  |  |  |  |  |  |  |  |  |  |  |                                                                                                                                                  |                                                                                                                       |
| II        |                                                   |                                                                                                                                                                                                                                                                                                                                                                                                                                                                                                                                                                                                      |   |  |  |  |  |  |  |  |  |  |  |  |  |    |  |  |  |  |  |  |  |  |  |  |  |  |                                          |                                 |  |  |  |  |  |  |  |  |  |  |  |                                                                                                                                                  |                                                                                                                       |
|           |                                                   |                                                                                                                                                                                                                                                                                                                                                                                                                                                                                                                                                                                                      |   |  |  |  |  |  |  |  |  |  |  |  |  |    |  |  |  |  |  |  |  |  |  |  |  |  |                                          |                                 |  |  |  |  |  |  |  |  |  |  |  |                                                                                                                                                  |                                                                                                                       |

|     |                                            |                                                                                                                                                                                                                                                                                                                                                                                                                                                                                                                                                                  |                                   |                          |  |  |  |  |  |  |  |  |  |  |  |  |                                                                                    |                                                                                     |  |  |  |  |  |  |  |  |  |  |  |  |     |  |  |  |  |  |  |  |  |  |  |  |  |  |                                                                                                                               |                                                                                                                       |             |
|-----|--------------------------------------------|------------------------------------------------------------------------------------------------------------------------------------------------------------------------------------------------------------------------------------------------------------------------------------------------------------------------------------------------------------------------------------------------------------------------------------------------------------------------------------------------------------------------------------------------------------------|-----------------------------------|--------------------------|--|--|--|--|--|--|--|--|--|--|--|--|------------------------------------------------------------------------------------|-------------------------------------------------------------------------------------|--|--|--|--|--|--|--|--|--|--|--|--|-----|--|--|--|--|--|--|--|--|--|--|--|--|--|-------------------------------------------------------------------------------------------------------------------------------|-----------------------------------------------------------------------------------------------------------------------|-------------|
|     |                                            | <table border="1"> <tr> <td>III</td> <td></td> <td></td> <td></td> <td></td> <td></td> <td></td> </tr> <tr> <td></td> <td></td> <td></td> <td></td> <td></td> <td></td> <td></td> </tr> </table>                                                                                                                                                                                                                                                                                                                                                                 | III                               |                          |  |  |  |  |  |  |  |  |  |  |  |  |  |  |  |  |  |  |  |  |  |  |  |  |  |  |     |  |  |  |  |  |  |  |  |  |  |  |  |  |                                                                                                                               |                                                                                                                       |             |
| III |                                            |                                                                                                                                                                                                                                                                                                                                                                                                                                                                                                                                                                  |                                   |                          |  |  |  |  |  |  |  |  |  |  |  |  |                                                                                    |                                                                                     |  |  |  |  |  |  |  |  |  |  |  |  |     |  |  |  |  |  |  |  |  |  |  |  |  |  |                                                                                                                               |                                                                                                                       |             |
|     |                                            |                                                                                                                                                                                                                                                                                                                                                                                                                                                                                                                                                                  |                                   |                          |  |  |  |  |  |  |  |  |  |  |  |  |                                                                                    |                                                                                     |  |  |  |  |  |  |  |  |  |  |  |  |     |  |  |  |  |  |  |  |  |  |  |  |  |  |                                                                                                                               |                                                                                                                       |             |
| 19  | <b>Date of observation</b><br><br>22.06.17 | <b>Phenophase</b><br><br><table border="1"> <tr> <td>I</td> <td></td> <td></td> <td></td> <td></td> <td></td> <td></td> </tr> <tr> <td></td> <td></td> <td></td> <td></td> <td></td> <td></td> <td></td> </tr> <tr> <td>II</td> <td></td> <td></td> <td></td> <td></td> <td></td> <td></td> </tr> <tr> <td></td> <td></td> <td></td> <td></td> <td></td> <td></td> <td></td> </tr> <tr> <td>III</td> <td></td> <td></td> <td></td> <td></td> <td></td> <td></td> </tr> <tr> <td></td> <td></td> <td></td> <td></td> <td></td> <td></td> <td></td> </tr> </table> | I                                 |                          |  |  |  |  |  |  |  |  |  |  |  |  | II                                                                                 |                                                                                     |  |  |  |  |  |  |  |  |  |  |  |  | III |  |  |  |  |  |  |  |  |  |  |  |  |  | <b>Photo of the entire object</b><br><br>  | <b>Photos of details</b><br><br>  | Notes: none |
| I   |                                            |                                                                                                                                                                                                                                                                                                                                                                                                                                                                                                                                                                  |                                   |                          |  |  |  |  |  |  |  |  |  |  |  |  |                                                                                    |                                                                                     |  |  |  |  |  |  |  |  |  |  |  |  |     |  |  |  |  |  |  |  |  |  |  |  |  |  |                                                                                                                               |                                                                                                                       |             |
|     |                                            |                                                                                                                                                                                                                                                                                                                                                                                                                                                                                                                                                                  |                                   |                          |  |  |  |  |  |  |  |  |  |  |  |  |                                                                                    |                                                                                     |  |  |  |  |  |  |  |  |  |  |  |  |     |  |  |  |  |  |  |  |  |  |  |  |  |  |                                                                                                                               |                                                                                                                       |             |
| II  |                                            |                                                                                                                                                                                                                                                                                                                                                                                                                                                                                                                                                                  |                                   |                          |  |  |  |  |  |  |  |  |  |  |  |  |                                                                                    |                                                                                     |  |  |  |  |  |  |  |  |  |  |  |  |     |  |  |  |  |  |  |  |  |  |  |  |  |  |                                                                                                                               |                                                                                                                       |             |
|     |                                            |                                                                                                                                                                                                                                                                                                                                                                                                                                                                                                                                                                  |                                   |                          |  |  |  |  |  |  |  |  |  |  |  |  |                                                                                    |                                                                                     |  |  |  |  |  |  |  |  |  |  |  |  |     |  |  |  |  |  |  |  |  |  |  |  |  |  |                                                                                                                               |                                                                                                                       |             |
| III |                                            |                                                                                                                                                                                                                                                                                                                                                                                                                                                                                                                                                                  |                                   |                          |  |  |  |  |  |  |  |  |  |  |  |  |                                                                                    |                                                                                     |  |  |  |  |  |  |  |  |  |  |  |  |     |  |  |  |  |  |  |  |  |  |  |  |  |  |                                                                                                                               |                                                                                                                       |             |
|     |                                            |                                                                                                                                                                                                                                                                                                                                                                                                                                                                                                                                                                  |                                   |                          |  |  |  |  |  |  |  |  |  |  |  |  |                                                                                    |                                                                                     |  |  |  |  |  |  |  |  |  |  |  |  |     |  |  |  |  |  |  |  |  |  |  |  |  |  |                                                                                                                               |                                                                                                                       |             |
| 20  | <b>Date of observation</b><br><br>30.06.17 | <b>Phenophase</b><br><br><table border="1"> <tr> <td>I</td> <td></td> <td></td> <td></td> <td></td> <td></td> <td></td> </tr> <tr> <td></td> <td></td> <td></td> <td></td> <td></td> <td></td> <td></td> </tr> <tr> <td>II</td> <td></td> <td></td> <td></td> <td></td> <td></td> <td></td> </tr> <tr> <td></td> <td></td> <td></td> <td></td> <td></td> <td></td> <td></td> </tr> <tr> <td>III</td> <td></td> <td></td> <td></td> <td></td> <td></td> <td></td> </tr> <tr> <td></td> <td></td> <td></td> <td></td> <td></td> <td></td> <td></td> </tr> </table> | I                                 |                          |  |  |  |  |  |  |  |  |  |  |  |  | II                                                                                 |                                                                                     |  |  |  |  |  |  |  |  |  |  |  |  | III |  |  |  |  |  |  |  |  |  |  |  |  |  | <b>Photo of the entire object</b><br><br> | <b>Photos of details</b><br><br> | Notes: none |
| I   |                                            |                                                                                                                                                                                                                                                                                                                                                                                                                                                                                                                                                                  |                                   |                          |  |  |  |  |  |  |  |  |  |  |  |  |                                                                                    |                                                                                     |  |  |  |  |  |  |  |  |  |  |  |  |     |  |  |  |  |  |  |  |  |  |  |  |  |  |                                                                                                                               |                                                                                                                       |             |
|     |                                            |                                                                                                                                                                                                                                                                                                                                                                                                                                                                                                                                                                  |                                   |                          |  |  |  |  |  |  |  |  |  |  |  |  |                                                                                    |                                                                                     |  |  |  |  |  |  |  |  |  |  |  |  |     |  |  |  |  |  |  |  |  |  |  |  |  |  |                                                                                                                               |                                                                                                                       |             |
| II  |                                            |                                                                                                                                                                                                                                                                                                                                                                                                                                                                                                                                                                  |                                   |                          |  |  |  |  |  |  |  |  |  |  |  |  |                                                                                    |                                                                                     |  |  |  |  |  |  |  |  |  |  |  |  |     |  |  |  |  |  |  |  |  |  |  |  |  |  |                                                                                                                               |                                                                                                                       |             |
|     |                                            |                                                                                                                                                                                                                                                                                                                                                                                                                                                                                                                                                                  |                                   |                          |  |  |  |  |  |  |  |  |  |  |  |  |                                                                                    |                                                                                     |  |  |  |  |  |  |  |  |  |  |  |  |     |  |  |  |  |  |  |  |  |  |  |  |  |  |                                                                                                                               |                                                                                                                       |             |
| III |                                            |                                                                                                                                                                                                                                                                                                                                                                                                                                                                                                                                                                  |                                   |                          |  |  |  |  |  |  |  |  |  |  |  |  |                                                                                    |                                                                                     |  |  |  |  |  |  |  |  |  |  |  |  |     |  |  |  |  |  |  |  |  |  |  |  |  |  |                                                                                                                               |                                                                                                                       |             |
|     |                                            |                                                                                                                                                                                                                                                                                                                                                                                                                                                                                                                                                                  |                                   |                          |  |  |  |  |  |  |  |  |  |  |  |  |                                                                                    |                                                                                     |  |  |  |  |  |  |  |  |  |  |  |  |     |  |  |  |  |  |  |  |  |  |  |  |  |  |                                                                                                                               |                                                                                                                       |             |
| 21  | <b>Date of observation</b>                 | <b>Phenophase</b>                                                                                                                                                                                                                                                                                                                                                                                                                                                                                                                                                | <b>Photo of the entire object</b> | <b>Photos of details</b> |  |  |  |  |  |  |  |  |  |  |  |  |                                                                                    |                                                                                     |  |  |  |  |  |  |  |  |  |  |  |  |     |  |  |  |  |  |  |  |  |  |  |  |  |  |                                                                                                                               |                                                                                                                       |             |

|     |                                            |                                                                                                                                                                                                                                                                                                                                                                                                                                                                                                                                                                 |                                   |                          |  |  |  |  |  |  |  |  |  |  |  |    |  |  |  |  |  |  |  |  |  |  |  |  |     |  |  |  |  |  |  |  |  |  |  |  |  |                                                                                                                               |                                                                                                                       |                                            |
|-----|--------------------------------------------|-----------------------------------------------------------------------------------------------------------------------------------------------------------------------------------------------------------------------------------------------------------------------------------------------------------------------------------------------------------------------------------------------------------------------------------------------------------------------------------------------------------------------------------------------------------------|-----------------------------------|--------------------------|--|--|--|--|--|--|--|--|--|--|--|----|--|--|--|--|--|--|--|--|--|--|--|--|-----|--|--|--|--|--|--|--|--|--|--|--|--|-------------------------------------------------------------------------------------------------------------------------------|-----------------------------------------------------------------------------------------------------------------------|--------------------------------------------|
|     | 08.07.17                                   | <table border="1"> <tr> <td rowspan="2">I</td> <td></td> <td></td> <td></td> <td></td> <td></td> <td></td> </tr> <tr> <td></td> <td></td> <td></td> <td></td> <td></td> <td></td> </tr> <tr> <td rowspan="2">II</td> <td></td> <td></td> <td></td> <td></td> <td></td> <td></td> </tr> <tr> <td></td> <td></td> <td></td> <td></td> <td></td> <td></td> </tr> <tr> <td rowspan="2">III</td> <td></td> <td></td> <td></td> <td></td> <td></td> <td></td> </tr> <tr> <td></td> <td></td> <td></td> <td></td> <td></td> <td></td> </tr> </table>                   | I                                 |                          |  |  |  |  |  |  |  |  |  |  |  | II |  |  |  |  |  |  |  |  |  |  |  |  | III |  |  |  |  |  |  |  |  |  |  |  |  |                                             |                                    | Notes: none                                |
| I   |                                            |                                                                                                                                                                                                                                                                                                                                                                                                                                                                                                                                                                 |                                   |                          |  |  |  |  |  |  |  |  |  |  |  |    |  |  |  |  |  |  |  |  |  |  |  |  |     |  |  |  |  |  |  |  |  |  |  |  |  |                                                                                                                               |                                                                                                                       |                                            |
|     |                                            |                                                                                                                                                                                                                                                                                                                                                                                                                                                                                                                                                                 |                                   |                          |  |  |  |  |  |  |  |  |  |  |  |    |  |  |  |  |  |  |  |  |  |  |  |  |     |  |  |  |  |  |  |  |  |  |  |  |  |                                                                                                                               |                                                                                                                       |                                            |
| II  |                                            |                                                                                                                                                                                                                                                                                                                                                                                                                                                                                                                                                                 |                                   |                          |  |  |  |  |  |  |  |  |  |  |  |    |  |  |  |  |  |  |  |  |  |  |  |  |     |  |  |  |  |  |  |  |  |  |  |  |  |                                                                                                                               |                                                                                                                       |                                            |
|     |                                            |                                                                                                                                                                                                                                                                                                                                                                                                                                                                                                                                                                 |                                   |                          |  |  |  |  |  |  |  |  |  |  |  |    |  |  |  |  |  |  |  |  |  |  |  |  |     |  |  |  |  |  |  |  |  |  |  |  |  |                                                                                                                               |                                                                                                                       |                                            |
| III |                                            |                                                                                                                                                                                                                                                                                                                                                                                                                                                                                                                                                                 |                                   |                          |  |  |  |  |  |  |  |  |  |  |  |    |  |  |  |  |  |  |  |  |  |  |  |  |     |  |  |  |  |  |  |  |  |  |  |  |  |                                                                                                                               |                                                                                                                       |                                            |
|     |                                            |                                                                                                                                                                                                                                                                                                                                                                                                                                                                                                                                                                 |                                   |                          |  |  |  |  |  |  |  |  |  |  |  |    |  |  |  |  |  |  |  |  |  |  |  |  |     |  |  |  |  |  |  |  |  |  |  |  |  |                                                                                                                               |                                                                                                                       |                                            |
| 22  | <b>Date of observation</b><br><br>18.07.17 | <b>Phenophase</b> <table border="1"> <tr> <td rowspan="2">I</td> <td></td> <td></td> <td></td> <td></td> <td></td> <td></td> </tr> <tr> <td></td> <td></td> <td></td> <td></td> <td></td> <td></td> </tr> <tr> <td rowspan="2">II</td> <td></td> <td></td> <td></td> <td></td> <td></td> <td></td> </tr> <tr> <td></td> <td></td> <td></td> <td></td> <td></td> <td></td> </tr> <tr> <td rowspan="2">III</td> <td></td> <td></td> <td></td> <td></td> <td></td> <td></td> </tr> <tr> <td></td> <td></td> <td></td> <td></td> <td></td> <td></td> </tr> </table> | I                                 |                          |  |  |  |  |  |  |  |  |  |  |  | II |  |  |  |  |  |  |  |  |  |  |  |  | III |  |  |  |  |  |  |  |  |  |  |  |  | <b>Photo of the entire object</b><br><br>  | <b>Photos of details</b><br><br>  | Notes: browning of the edges of the leaves |
| I   |                                            |                                                                                                                                                                                                                                                                                                                                                                                                                                                                                                                                                                 |                                   |                          |  |  |  |  |  |  |  |  |  |  |  |    |  |  |  |  |  |  |  |  |  |  |  |  |     |  |  |  |  |  |  |  |  |  |  |  |  |                                                                                                                               |                                                                                                                       |                                            |
|     |                                            |                                                                                                                                                                                                                                                                                                                                                                                                                                                                                                                                                                 |                                   |                          |  |  |  |  |  |  |  |  |  |  |  |    |  |  |  |  |  |  |  |  |  |  |  |  |     |  |  |  |  |  |  |  |  |  |  |  |  |                                                                                                                               |                                                                                                                       |                                            |
| II  |                                            |                                                                                                                                                                                                                                                                                                                                                                                                                                                                                                                                                                 |                                   |                          |  |  |  |  |  |  |  |  |  |  |  |    |  |  |  |  |  |  |  |  |  |  |  |  |     |  |  |  |  |  |  |  |  |  |  |  |  |                                                                                                                               |                                                                                                                       |                                            |
|     |                                            |                                                                                                                                                                                                                                                                                                                                                                                                                                                                                                                                                                 |                                   |                          |  |  |  |  |  |  |  |  |  |  |  |    |  |  |  |  |  |  |  |  |  |  |  |  |     |  |  |  |  |  |  |  |  |  |  |  |  |                                                                                                                               |                                                                                                                       |                                            |
| III |                                            |                                                                                                                                                                                                                                                                                                                                                                                                                                                                                                                                                                 |                                   |                          |  |  |  |  |  |  |  |  |  |  |  |    |  |  |  |  |  |  |  |  |  |  |  |  |     |  |  |  |  |  |  |  |  |  |  |  |  |                                                                                                                               |                                                                                                                       |                                            |
|     |                                            |                                                                                                                                                                                                                                                                                                                                                                                                                                                                                                                                                                 |                                   |                          |  |  |  |  |  |  |  |  |  |  |  |    |  |  |  |  |  |  |  |  |  |  |  |  |     |  |  |  |  |  |  |  |  |  |  |  |  |                                                                                                                               |                                                                                                                       |                                            |
| 23  | <b>Date of observation</b><br><br>15.07.17 | <b>Phenophase</b> <table border="1"> <tr> <td rowspan="2">I</td> <td></td> <td></td> <td></td> <td></td> <td></td> <td></td> </tr> <tr> <td></td> <td></td> <td></td> <td></td> <td></td> <td></td> </tr> <tr> <td rowspan="2">II</td> <td></td> <td></td> <td></td> <td></td> <td></td> <td></td> </tr> <tr> <td></td> <td></td> <td></td> <td></td> <td></td> <td></td> </tr> <tr> <td rowspan="2">III</td> <td></td> <td></td> <td></td> <td></td> <td></td> <td></td> </tr> <tr> <td></td> <td></td> <td></td> <td></td> <td></td> <td></td> </tr> </table> | I                                 |                          |  |  |  |  |  |  |  |  |  |  |  | II |  |  |  |  |  |  |  |  |  |  |  |  | III |  |  |  |  |  |  |  |  |  |  |  |  | <b>Photo of the entire object</b><br><br> | <b>Photos of details</b><br><br> | Notes: browning of the edges of the leaves |
| I   |                                            |                                                                                                                                                                                                                                                                                                                                                                                                                                                                                                                                                                 |                                   |                          |  |  |  |  |  |  |  |  |  |  |  |    |  |  |  |  |  |  |  |  |  |  |  |  |     |  |  |  |  |  |  |  |  |  |  |  |  |                                                                                                                               |                                                                                                                       |                                            |
|     |                                            |                                                                                                                                                                                                                                                                                                                                                                                                                                                                                                                                                                 |                                   |                          |  |  |  |  |  |  |  |  |  |  |  |    |  |  |  |  |  |  |  |  |  |  |  |  |     |  |  |  |  |  |  |  |  |  |  |  |  |                                                                                                                               |                                                                                                                       |                                            |
| II  |                                            |                                                                                                                                                                                                                                                                                                                                                                                                                                                                                                                                                                 |                                   |                          |  |  |  |  |  |  |  |  |  |  |  |    |  |  |  |  |  |  |  |  |  |  |  |  |     |  |  |  |  |  |  |  |  |  |  |  |  |                                                                                                                               |                                                                                                                       |                                            |
|     |                                            |                                                                                                                                                                                                                                                                                                                                                                                                                                                                                                                                                                 |                                   |                          |  |  |  |  |  |  |  |  |  |  |  |    |  |  |  |  |  |  |  |  |  |  |  |  |     |  |  |  |  |  |  |  |  |  |  |  |  |                                                                                                                               |                                                                                                                       |                                            |
| III |                                            |                                                                                                                                                                                                                                                                                                                                                                                                                                                                                                                                                                 |                                   |                          |  |  |  |  |  |  |  |  |  |  |  |    |  |  |  |  |  |  |  |  |  |  |  |  |     |  |  |  |  |  |  |  |  |  |  |  |  |                                                                                                                               |                                                                                                                       |                                            |
|     |                                            |                                                                                                                                                                                                                                                                                                                                                                                                                                                                                                                                                                 |                                   |                          |  |  |  |  |  |  |  |  |  |  |  |    |  |  |  |  |  |  |  |  |  |  |  |  |     |  |  |  |  |  |  |  |  |  |  |  |  |                                                                                                                               |                                                                                                                       |                                            |
| 24  | <b>Date of observation</b>                 | <b>Phenophase</b>                                                                                                                                                                                                                                                                                                                                                                                                                                                                                                                                               | <b>Photo of the entire object</b> | <b>Photos of details</b> |  |  |  |  |  |  |  |  |  |  |  |    |  |  |  |  |  |  |  |  |  |  |  |  |     |  |  |  |  |  |  |  |  |  |  |  |  |                                                                                                                               |                                                                                                                       |                                            |

|     |                                            |                                                                                                                                                                                                                                                                                                                                                                                                                                                                                                                                                                                                                                                                                                                                                                                                                                                                                                                                                                                                                                                                                                                                                                                                                                                                                                                    |                                   |                          |  |  |  |  |  |  |  |  |  |  |  |  |    |  |  |  |  |  |  |  |  |  |  |  |  |  |     |  |  |  |  |  |  |  |  |  |  |  |  |  |                                                                                                                               |                                                                                                                       |                               |
|-----|--------------------------------------------|--------------------------------------------------------------------------------------------------------------------------------------------------------------------------------------------------------------------------------------------------------------------------------------------------------------------------------------------------------------------------------------------------------------------------------------------------------------------------------------------------------------------------------------------------------------------------------------------------------------------------------------------------------------------------------------------------------------------------------------------------------------------------------------------------------------------------------------------------------------------------------------------------------------------------------------------------------------------------------------------------------------------------------------------------------------------------------------------------------------------------------------------------------------------------------------------------------------------------------------------------------------------------------------------------------------------|-----------------------------------|--------------------------|--|--|--|--|--|--|--|--|--|--|--|--|----|--|--|--|--|--|--|--|--|--|--|--|--|--|-----|--|--|--|--|--|--|--|--|--|--|--|--|--|-------------------------------------------------------------------------------------------------------------------------------|-----------------------------------------------------------------------------------------------------------------------|-------------------------------|
|     | 04.08.17                                   | <table border="1"> <tr> <td data-bbox="352 165 392 199">I</td> <td data-bbox="392 118 472 176"></td> <td data-bbox="472 118 552 176"></td> <td data-bbox="552 118 632 176"></td> <td data-bbox="632 118 711 176"></td> <td data-bbox="711 118 791 176"></td> <td data-bbox="791 118 855 176"></td> </tr> <tr> <td></td> <td></td> <td></td> <td style="background-color: black;"></td> <td></td> <td></td> <td></td> </tr> <tr> <td data-bbox="352 322 392 356">II</td> <td data-bbox="392 275 472 333"></td> <td data-bbox="472 275 552 333"></td> <td data-bbox="552 275 632 333"></td> <td data-bbox="632 275 711 333"></td> <td data-bbox="711 275 791 333"></td> <td data-bbox="791 275 855 333"></td> </tr> <tr> <td></td> <td></td> <td></td> <td></td> <td></td> <td></td> <td style="background-color: black;"></td> </tr> <tr> <td data-bbox="352 468 392 501">III</td> <td data-bbox="392 421 472 479"></td> <td data-bbox="472 421 552 479"></td> <td data-bbox="552 421 632 479"></td> <td data-bbox="632 421 711 479"></td> <td data-bbox="711 421 791 479"></td> <td data-bbox="791 421 855 479"></td> </tr> <tr> <td></td> <td></td> <td style="background-color: black;"></td> <td></td> <td></td> <td></td> <td></td> </tr> </table>                                                             | I                                 |                          |  |  |  |  |  |  |  |  |  |  |  |  | II |  |  |  |  |  |  |  |  |  |  |  |  |  | III |  |  |  |  |  |  |  |  |  |  |  |  |  |                                             |                                    | Notes: browning of the leaves |
| I   |                                            |                                                                                                                                                                                                                                                                                                                                                                                                                                                                                                                                                                                                                                                                                                                                                                                                                                                                                                                                                                                                                                                                                                                                                                                                                                                                                                                    |                                   |                          |  |  |  |  |  |  |  |  |  |  |  |  |    |  |  |  |  |  |  |  |  |  |  |  |  |  |     |  |  |  |  |  |  |  |  |  |  |  |  |  |                                                                                                                               |                                                                                                                       |                               |
|     |                                            |                                                                                                                                                                                                                                                                                                                                                                                                                                                                                                                                                                                                                                                                                                                                                                                                                                                                                                                                                                                                                                                                                                                                                                                                                                                                                                                    |                                   |                          |  |  |  |  |  |  |  |  |  |  |  |  |    |  |  |  |  |  |  |  |  |  |  |  |  |  |     |  |  |  |  |  |  |  |  |  |  |  |  |  |                                                                                                                               |                                                                                                                       |                               |
| II  |                                            |                                                                                                                                                                                                                                                                                                                                                                                                                                                                                                                                                                                                                                                                                                                                                                                                                                                                                                                                                                                                                                                                                                                                                                                                                                                                                                                    |                                   |                          |  |  |  |  |  |  |  |  |  |  |  |  |    |  |  |  |  |  |  |  |  |  |  |  |  |  |     |  |  |  |  |  |  |  |  |  |  |  |  |  |                                                                                                                               |                                                                                                                       |                               |
|     |                                            |                                                                                                                                                                                                                                                                                                                                                                                                                                                                                                                                                                                                                                                                                                                                                                                                                                                                                                                                                                                                                                                                                                                                                                                                                                                                                                                    |                                   |                          |  |  |  |  |  |  |  |  |  |  |  |  |    |  |  |  |  |  |  |  |  |  |  |  |  |  |     |  |  |  |  |  |  |  |  |  |  |  |  |  |                                                                                                                               |                                                                                                                       |                               |
| III |                                            |                                                                                                                                                                                                                                                                                                                                                                                                                                                                                                                                                                                                                                                                                                                                                                                                                                                                                                                                                                                                                                                                                                                                                                                                                                                                                                                    |                                   |                          |  |  |  |  |  |  |  |  |  |  |  |  |    |  |  |  |  |  |  |  |  |  |  |  |  |  |     |  |  |  |  |  |  |  |  |  |  |  |  |  |                                                                                                                               |                                                                                                                       |                               |
|     |                                            |                                                                                                                                                                                                                                                                                                                                                                                                                                                                                                                                                                                                                                                                                                                                                                                                                                                                                                                                                                                                                                                                                                                                                                                                                                                                                                                    |                                   |                          |  |  |  |  |  |  |  |  |  |  |  |  |    |  |  |  |  |  |  |  |  |  |  |  |  |  |     |  |  |  |  |  |  |  |  |  |  |  |  |  |                                                                                                                               |                                                                                                                       |                               |
| 25  | <b>Date of observation</b><br><br>12.08.17 | <b>Phenophase</b> <table border="1"> <tr> <td data-bbox="352 680 392 714">I</td> <td data-bbox="392 633 472 692"></td> <td data-bbox="472 633 552 692"></td> <td data-bbox="552 633 632 692"></td> <td data-bbox="632 633 711 692"></td> <td data-bbox="711 633 791 692"></td> <td data-bbox="791 633 855 692"></td> </tr> <tr> <td></td> <td></td> <td></td> <td style="background-color: black;"></td> <td></td> <td></td> <td></td> </tr> <tr> <td data-bbox="352 837 392 871">II</td> <td data-bbox="392 790 472 848"></td> <td data-bbox="472 790 552 848"></td> <td data-bbox="552 790 632 848"></td> <td data-bbox="632 790 711 848"></td> <td data-bbox="711 790 791 848"></td> <td data-bbox="791 790 855 848"></td> </tr> <tr> <td></td> <td></td> <td></td> <td></td> <td></td> <td></td> <td style="background-color: black;"></td> </tr> <tr> <td data-bbox="352 994 392 1028">III</td> <td data-bbox="392 947 472 1005"></td> <td data-bbox="472 947 552 1005"></td> <td data-bbox="552 947 632 1005"></td> <td data-bbox="632 947 711 1005"></td> <td data-bbox="711 947 791 1005"></td> <td data-bbox="791 947 855 1005"></td> </tr> <tr> <td></td> <td></td> <td style="background-color: black;"></td> <td></td> <td></td> <td></td> <td></td> </tr> </table>                                    | I                                 |                          |  |  |  |  |  |  |  |  |  |  |  |  | II |  |  |  |  |  |  |  |  |  |  |  |  |  | III |  |  |  |  |  |  |  |  |  |  |  |  |  | <b>Photo of the entire object</b><br><br>  | <b>Photos of details</b><br><br>  | Notes: none                   |
| I   |                                            |                                                                                                                                                                                                                                                                                                                                                                                                                                                                                                                                                                                                                                                                                                                                                                                                                                                                                                                                                                                                                                                                                                                                                                                                                                                                                                                    |                                   |                          |  |  |  |  |  |  |  |  |  |  |  |  |    |  |  |  |  |  |  |  |  |  |  |  |  |  |     |  |  |  |  |  |  |  |  |  |  |  |  |  |                                                                                                                               |                                                                                                                       |                               |
|     |                                            |                                                                                                                                                                                                                                                                                                                                                                                                                                                                                                                                                                                                                                                                                                                                                                                                                                                                                                                                                                                                                                                                                                                                                                                                                                                                                                                    |                                   |                          |  |  |  |  |  |  |  |  |  |  |  |  |    |  |  |  |  |  |  |  |  |  |  |  |  |  |     |  |  |  |  |  |  |  |  |  |  |  |  |  |                                                                                                                               |                                                                                                                       |                               |
| II  |                                            |                                                                                                                                                                                                                                                                                                                                                                                                                                                                                                                                                                                                                                                                                                                                                                                                                                                                                                                                                                                                                                                                                                                                                                                                                                                                                                                    |                                   |                          |  |  |  |  |  |  |  |  |  |  |  |  |    |  |  |  |  |  |  |  |  |  |  |  |  |  |     |  |  |  |  |  |  |  |  |  |  |  |  |  |                                                                                                                               |                                                                                                                       |                               |
|     |                                            |                                                                                                                                                                                                                                                                                                                                                                                                                                                                                                                                                                                                                                                                                                                                                                                                                                                                                                                                                                                                                                                                                                                                                                                                                                                                                                                    |                                   |                          |  |  |  |  |  |  |  |  |  |  |  |  |    |  |  |  |  |  |  |  |  |  |  |  |  |  |     |  |  |  |  |  |  |  |  |  |  |  |  |  |                                                                                                                               |                                                                                                                       |                               |
| III |                                            |                                                                                                                                                                                                                                                                                                                                                                                                                                                                                                                                                                                                                                                                                                                                                                                                                                                                                                                                                                                                                                                                                                                                                                                                                                                                                                                    |                                   |                          |  |  |  |  |  |  |  |  |  |  |  |  |    |  |  |  |  |  |  |  |  |  |  |  |  |  |     |  |  |  |  |  |  |  |  |  |  |  |  |  |                                                                                                                               |                                                                                                                       |                               |
|     |                                            |                                                                                                                                                                                                                                                                                                                                                                                                                                                                                                                                                                                                                                                                                                                                                                                                                                                                                                                                                                                                                                                                                                                                                                                                                                                                                                                    |                                   |                          |  |  |  |  |  |  |  |  |  |  |  |  |    |  |  |  |  |  |  |  |  |  |  |  |  |  |     |  |  |  |  |  |  |  |  |  |  |  |  |  |                                                                                                                               |                                                                                                                       |                               |
| 26  | <b>Date of observation</b><br><br>20.08.17 | <b>Phenophase</b> <table border="1"> <tr> <td data-bbox="352 1240 392 1274">I</td> <td data-bbox="392 1193 472 1252"></td> <td data-bbox="472 1193 552 1252"></td> <td data-bbox="552 1193 632 1252"></td> <td data-bbox="632 1193 711 1252"></td> <td data-bbox="711 1193 791 1252"></td> <td data-bbox="791 1193 855 1252"></td> </tr> <tr> <td></td> <td></td> <td></td> <td style="background-color: black;"></td> <td></td> <td></td> <td></td> </tr> <tr> <td data-bbox="352 1397 392 1431">II</td> <td data-bbox="392 1350 472 1408"></td> <td data-bbox="472 1350 552 1408"></td> <td data-bbox="552 1350 632 1408"></td> <td data-bbox="632 1350 711 1408"></td> <td data-bbox="711 1350 791 1408"></td> <td data-bbox="791 1350 855 1408"></td> </tr> <tr> <td></td> <td></td> <td></td> <td></td> <td></td> <td></td> <td style="background-color: black;"></td> </tr> <tr> <td data-bbox="352 1554 392 1588">III</td> <td data-bbox="392 1507 472 1565"></td> <td data-bbox="472 1507 552 1565"></td> <td data-bbox="552 1507 632 1565"></td> <td data-bbox="632 1507 711 1565"></td> <td data-bbox="711 1507 791 1565"></td> <td data-bbox="791 1507 855 1565"></td> </tr> <tr> <td></td> <td></td> <td style="background-color: black;"></td> <td></td> <td></td> <td></td> <td></td> </tr> </table> | I                                 |                          |  |  |  |  |  |  |  |  |  |  |  |  | II |  |  |  |  |  |  |  |  |  |  |  |  |  | III |  |  |  |  |  |  |  |  |  |  |  |  |  | <b>Photo of the entire object</b><br><br> | <b>Photos of details</b><br><br> | Notes: none                   |
| I   |                                            |                                                                                                                                                                                                                                                                                                                                                                                                                                                                                                                                                                                                                                                                                                                                                                                                                                                                                                                                                                                                                                                                                                                                                                                                                                                                                                                    |                                   |                          |  |  |  |  |  |  |  |  |  |  |  |  |    |  |  |  |  |  |  |  |  |  |  |  |  |  |     |  |  |  |  |  |  |  |  |  |  |  |  |  |                                                                                                                               |                                                                                                                       |                               |
|     |                                            |                                                                                                                                                                                                                                                                                                                                                                                                                                                                                                                                                                                                                                                                                                                                                                                                                                                                                                                                                                                                                                                                                                                                                                                                                                                                                                                    |                                   |                          |  |  |  |  |  |  |  |  |  |  |  |  |    |  |  |  |  |  |  |  |  |  |  |  |  |  |     |  |  |  |  |  |  |  |  |  |  |  |  |  |                                                                                                                               |                                                                                                                       |                               |
| II  |                                            |                                                                                                                                                                                                                                                                                                                                                                                                                                                                                                                                                                                                                                                                                                                                                                                                                                                                                                                                                                                                                                                                                                                                                                                                                                                                                                                    |                                   |                          |  |  |  |  |  |  |  |  |  |  |  |  |    |  |  |  |  |  |  |  |  |  |  |  |  |  |     |  |  |  |  |  |  |  |  |  |  |  |  |  |                                                                                                                               |                                                                                                                       |                               |
|     |                                            |                                                                                                                                                                                                                                                                                                                                                                                                                                                                                                                                                                                                                                                                                                                                                                                                                                                                                                                                                                                                                                                                                                                                                                                                                                                                                                                    |                                   |                          |  |  |  |  |  |  |  |  |  |  |  |  |    |  |  |  |  |  |  |  |  |  |  |  |  |  |     |  |  |  |  |  |  |  |  |  |  |  |  |  |                                                                                                                               |                                                                                                                       |                               |
| III |                                            |                                                                                                                                                                                                                                                                                                                                                                                                                                                                                                                                                                                                                                                                                                                                                                                                                                                                                                                                                                                                                                                                                                                                                                                                                                                                                                                    |                                   |                          |  |  |  |  |  |  |  |  |  |  |  |  |    |  |  |  |  |  |  |  |  |  |  |  |  |  |     |  |  |  |  |  |  |  |  |  |  |  |  |  |                                                                                                                               |                                                                                                                       |                               |
|     |                                            |                                                                                                                                                                                                                                                                                                                                                                                                                                                                                                                                                                                                                                                                                                                                                                                                                                                                                                                                                                                                                                                                                                                                                                                                                                                                                                                    |                                   |                          |  |  |  |  |  |  |  |  |  |  |  |  |    |  |  |  |  |  |  |  |  |  |  |  |  |  |     |  |  |  |  |  |  |  |  |  |  |  |  |  |                                                                                                                               |                                                                                                                       |                               |
| 27  | <b>Date of observation</b>                 | <b>Phenophase</b>                                                                                                                                                                                                                                                                                                                                                                                                                                                                                                                                                                                                                                                                                                                                                                                                                                                                                                                                                                                                                                                                                                                                                                                                                                                                                                  | <b>Photo of the entire object</b> | <b>Photos of details</b> |  |  |  |  |  |  |  |  |  |  |  |  |    |  |  |  |  |  |  |  |  |  |  |  |  |  |     |  |  |  |  |  |  |  |  |  |  |  |  |  |                                                                                                                               |                                                                                                                       |                               |



|                                                      |                                                                                                                                                                                                                                                                                                                                                                                                                                                                                                                                                                                                                                                                                                                                                                                                                    |                                   |                          |  |  |  |  |  |  |  |  |  |  |  |  |  |  |  |  |  |  |  |  |  |  |  |  |  |  |  |  |  |  |  |  |  |  |  |  |  |  |                                                                                                                                          |                                                                                                                |
|------------------------------------------------------|--------------------------------------------------------------------------------------------------------------------------------------------------------------------------------------------------------------------------------------------------------------------------------------------------------------------------------------------------------------------------------------------------------------------------------------------------------------------------------------------------------------------------------------------------------------------------------------------------------------------------------------------------------------------------------------------------------------------------------------------------------------------------------------------------------------------|-----------------------------------|--------------------------|--|--|--|--|--|--|--|--|--|--|--|--|--|--|--|--|--|--|--|--|--|--|--|--|--|--|--|--|--|--|--|--|--|--|--|--|--|--|------------------------------------------------------------------------------------------------------------------------------------------|----------------------------------------------------------------------------------------------------------------|
|                                                      | <p>27.08.17</p> <p>I</p> <table border="1" data-bbox="357 120 858 248"> <tr> <td></td> <td></td> <td></td> <td></td> <td></td> <td></td> <td></td> </tr> <tr> <td></td> <td></td> <td></td> <td style="background-color: black;"></td> <td></td> <td></td> <td></td> </tr> </table> <p>II</p> <table border="1" data-bbox="357 277 858 392"> <tr> <td></td> <td></td> <td></td> <td></td> <td></td> <td></td> <td></td> </tr> <tr> <td></td> <td></td> <td></td> <td></td> <td></td> <td></td> <td style="background-color: black;"></td> </tr> </table> <p>III</p> <table border="1" data-bbox="357 421 799 548"> <tr> <td></td> <td></td> <td></td> <td></td> <td></td> <td></td> </tr> <tr> <td></td> <td style="background-color: black;"></td> <td></td> <td></td> <td></td> <td></td> </tr> </table>         |                                   |                          |  |  |  |  |  |  |  |  |  |  |  |  |  |  |  |  |  |  |  |  |  |  |  |  |  |  |  |  |  |  |  |  |  |  |  |  |  |  |                                                        |                             |
|                                                      |                                                                                                                                                                                                                                                                                                                                                                                                                                                                                                                                                                                                                                                                                                                                                                                                                    |                                   |                          |  |  |  |  |  |  |  |  |  |  |  |  |  |  |  |  |  |  |  |  |  |  |  |  |  |  |  |  |  |  |  |  |  |  |  |  |  |  |                                                                                                                                          |                                                                                                                |
|                                                      |                                                                                                                                                                                                                                                                                                                                                                                                                                                                                                                                                                                                                                                                                                                                                                                                                    |                                   |                          |  |  |  |  |  |  |  |  |  |  |  |  |  |  |  |  |  |  |  |  |  |  |  |  |  |  |  |  |  |  |  |  |  |  |  |  |  |  |                                                                                                                                          |                                                                                                                |
|                                                      |                                                                                                                                                                                                                                                                                                                                                                                                                                                                                                                                                                                                                                                                                                                                                                                                                    |                                   |                          |  |  |  |  |  |  |  |  |  |  |  |  |  |  |  |  |  |  |  |  |  |  |  |  |  |  |  |  |  |  |  |  |  |  |  |  |  |  |                                                                                                                                          |                                                                                                                |
|                                                      |                                                                                                                                                                                                                                                                                                                                                                                                                                                                                                                                                                                                                                                                                                                                                                                                                    |                                   |                          |  |  |  |  |  |  |  |  |  |  |  |  |  |  |  |  |  |  |  |  |  |  |  |  |  |  |  |  |  |  |  |  |  |  |  |  |  |  |                                                                                                                                          |                                                                                                                |
|                                                      |                                                                                                                                                                                                                                                                                                                                                                                                                                                                                                                                                                                                                                                                                                                                                                                                                    |                                   |                          |  |  |  |  |  |  |  |  |  |  |  |  |  |  |  |  |  |  |  |  |  |  |  |  |  |  |  |  |  |  |  |  |  |  |  |  |  |  |                                                                                                                                          |                                                                                                                |
|                                                      |                                                                                                                                                                                                                                                                                                                                                                                                                                                                                                                                                                                                                                                                                                                                                                                                                    |                                   |                          |  |  |  |  |  |  |  |  |  |  |  |  |  |  |  |  |  |  |  |  |  |  |  |  |  |  |  |  |  |  |  |  |  |  |  |  |  |  |                                                                                                                                          |                                                                                                                |
| <p>28</p> <p>Date of observation</p> <p>05.09.17</p> | <p>Phenophase</p> <p>I</p> <table border="1" data-bbox="357 696 858 831"> <tr> <td></td> <td></td> <td></td> <td></td> <td></td> <td></td> <td></td> </tr> <tr> <td></td> <td></td> <td></td> <td style="background-color: black;"></td> <td></td> <td></td> <td></td> </tr> </table> <p>II</p> <table border="1" data-bbox="357 860 858 974"> <tr> <td></td> <td></td> <td></td> <td></td> <td></td> <td></td> <td></td> </tr> <tr> <td></td> <td></td> <td></td> <td></td> <td></td> <td></td> <td style="background-color: black;"></td> </tr> </table> <p>III</p> <table border="1" data-bbox="357 1003 799 1131"> <tr> <td></td> <td></td> <td></td> <td></td> <td></td> <td></td> </tr> <tr> <td></td> <td style="background-color: black;"></td> <td></td> <td></td> <td></td> <td></td> </tr> </table>     |                                   |                          |  |  |  |  |  |  |  |  |  |  |  |  |  |  |  |  |  |  |  |  |  |  |  |  |  |  |  |  |  |  |  |  |  |  |  |  |  |  | <p>Photo of the entire object</p>  <p>Notes: none</p> | <p>Photos of details</p>   |
|                                                      |                                                                                                                                                                                                                                                                                                                                                                                                                                                                                                                                                                                                                                                                                                                                                                                                                    |                                   |                          |  |  |  |  |  |  |  |  |  |  |  |  |  |  |  |  |  |  |  |  |  |  |  |  |  |  |  |  |  |  |  |  |  |  |  |  |  |  |                                                                                                                                          |                                                                                                                |
|                                                      |                                                                                                                                                                                                                                                                                                                                                                                                                                                                                                                                                                                                                                                                                                                                                                                                                    |                                   |                          |  |  |  |  |  |  |  |  |  |  |  |  |  |  |  |  |  |  |  |  |  |  |  |  |  |  |  |  |  |  |  |  |  |  |  |  |  |  |                                                                                                                                          |                                                                                                                |
|                                                      |                                                                                                                                                                                                                                                                                                                                                                                                                                                                                                                                                                                                                                                                                                                                                                                                                    |                                   |                          |  |  |  |  |  |  |  |  |  |  |  |  |  |  |  |  |  |  |  |  |  |  |  |  |  |  |  |  |  |  |  |  |  |  |  |  |  |  |                                                                                                                                          |                                                                                                                |
|                                                      |                                                                                                                                                                                                                                                                                                                                                                                                                                                                                                                                                                                                                                                                                                                                                                                                                    |                                   |                          |  |  |  |  |  |  |  |  |  |  |  |  |  |  |  |  |  |  |  |  |  |  |  |  |  |  |  |  |  |  |  |  |  |  |  |  |  |  |                                                                                                                                          |                                                                                                                |
|                                                      |                                                                                                                                                                                                                                                                                                                                                                                                                                                                                                                                                                                                                                                                                                                                                                                                                    |                                   |                          |  |  |  |  |  |  |  |  |  |  |  |  |  |  |  |  |  |  |  |  |  |  |  |  |  |  |  |  |  |  |  |  |  |  |  |  |  |  |                                                                                                                                          |                                                                                                                |
|                                                      |                                                                                                                                                                                                                                                                                                                                                                                                                                                                                                                                                                                                                                                                                                                                                                                                                    |                                   |                          |  |  |  |  |  |  |  |  |  |  |  |  |  |  |  |  |  |  |  |  |  |  |  |  |  |  |  |  |  |  |  |  |  |  |  |  |  |  |                                                                                                                                          |                                                                                                                |
| <p>29</p> <p>Date of observation</p> <p>12.09.17</p> | <p>Phenophase</p> <p>I</p> <table border="1" data-bbox="357 1256 858 1391"> <tr> <td></td> <td></td> <td></td> <td></td> <td></td> <td></td> <td></td> </tr> <tr> <td></td> <td></td> <td></td> <td></td> <td style="background-color: black;"></td> <td></td> <td></td> </tr> </table> <p>II</p> <table border="1" data-bbox="357 1420 858 1534"> <tr> <td></td> <td></td> <td></td> <td></td> <td></td> <td></td> <td></td> </tr> <tr> <td></td> <td></td> <td></td> <td></td> <td></td> <td></td> <td style="background-color: black;"></td> </tr> </table> <p>III</p> <table border="1" data-bbox="357 1563 799 1691"> <tr> <td></td> <td></td> <td></td> <td></td> <td></td> <td></td> </tr> <tr> <td></td> <td style="background-color: black;"></td> <td></td> <td></td> <td></td> <td></td> </tr> </table> |                                   |                          |  |  |  |  |  |  |  |  |  |  |  |  |  |  |  |  |  |  |  |  |  |  |  |  |  |  |  |  |  |  |  |  |  |  |  |  |  |  | <p>Photo of the entire object</p>                    | <p>Photos of details</p>  |
|                                                      |                                                                                                                                                                                                                                                                                                                                                                                                                                                                                                                                                                                                                                                                                                                                                                                                                    |                                   |                          |  |  |  |  |  |  |  |  |  |  |  |  |  |  |  |  |  |  |  |  |  |  |  |  |  |  |  |  |  |  |  |  |  |  |  |  |  |  |                                                                                                                                          |                                                                                                                |
|                                                      |                                                                                                                                                                                                                                                                                                                                                                                                                                                                                                                                                                                                                                                                                                                                                                                                                    |                                   |                          |  |  |  |  |  |  |  |  |  |  |  |  |  |  |  |  |  |  |  |  |  |  |  |  |  |  |  |  |  |  |  |  |  |  |  |  |  |  |                                                                                                                                          |                                                                                                                |
|                                                      |                                                                                                                                                                                                                                                                                                                                                                                                                                                                                                                                                                                                                                                                                                                                                                                                                    |                                   |                          |  |  |  |  |  |  |  |  |  |  |  |  |  |  |  |  |  |  |  |  |  |  |  |  |  |  |  |  |  |  |  |  |  |  |  |  |  |  |                                                                                                                                          |                                                                                                                |
|                                                      |                                                                                                                                                                                                                                                                                                                                                                                                                                                                                                                                                                                                                                                                                                                                                                                                                    |                                   |                          |  |  |  |  |  |  |  |  |  |  |  |  |  |  |  |  |  |  |  |  |  |  |  |  |  |  |  |  |  |  |  |  |  |  |  |  |  |  |                                                                                                                                          |                                                                                                                |
|                                                      |                                                                                                                                                                                                                                                                                                                                                                                                                                                                                                                                                                                                                                                                                                                                                                                                                    |                                   |                          |  |  |  |  |  |  |  |  |  |  |  |  |  |  |  |  |  |  |  |  |  |  |  |  |  |  |  |  |  |  |  |  |  |  |  |  |  |  |                                                                                                                                          |                                                                                                                |
|                                                      |                                                                                                                                                                                                                                                                                                                                                                                                                                                                                                                                                                                                                                                                                                                                                                                                                    |                                   |                          |  |  |  |  |  |  |  |  |  |  |  |  |  |  |  |  |  |  |  |  |  |  |  |  |  |  |  |  |  |  |  |  |  |  |  |  |  |  |                                                                                                                                          |                                                                                                                |
| <p>30</p> <p>Date of observation</p>                 | <p>Phenophase</p>                                                                                                                                                                                                                                                                                                                                                                                                                                                                                                                                                                                                                                                                                                                                                                                                  | <p>Photo of the entire object</p> | <p>Photos of details</p> |  |  |  |  |  |  |  |  |  |  |  |  |  |  |  |  |  |  |  |  |  |  |  |  |  |  |  |  |  |  |  |  |  |  |  |  |  |  |                                                                                                                                          |                                                                                                                |

|     |                                            |                                                                                                                                                                                                                                                                                                                                                                                                                                                                                                                                                                 |   |  |  |  |  |  |  |  |  |  |  |  |  |    |  |  |  |  |  |  |  |  |  |  |  |  |                                                                                                                               |                                                                                                                       |  |  |  |  |  |  |  |  |  |  |  |                                                                                                                               |                                                                                                                       |             |
|-----|--------------------------------------------|-----------------------------------------------------------------------------------------------------------------------------------------------------------------------------------------------------------------------------------------------------------------------------------------------------------------------------------------------------------------------------------------------------------------------------------------------------------------------------------------------------------------------------------------------------------------|---|--|--|--|--|--|--|--|--|--|--|--|--|----|--|--|--|--|--|--|--|--|--|--|--|--|-------------------------------------------------------------------------------------------------------------------------------|-----------------------------------------------------------------------------------------------------------------------|--|--|--|--|--|--|--|--|--|--|--|-------------------------------------------------------------------------------------------------------------------------------|-----------------------------------------------------------------------------------------------------------------------|-------------|
|     | 19.09.17                                   | <table border="1"> <tr> <td rowspan="2">I</td> <td></td> <td></td> <td></td> <td></td> <td></td> <td></td> </tr> <tr> <td></td> <td></td> <td></td> <td></td> <td></td> <td></td> </tr> <tr> <td rowspan="2">II</td> <td></td> <td></td> <td></td> <td></td> <td></td> <td></td> </tr> <tr> <td></td> <td></td> <td></td> <td></td> <td></td> <td></td> </tr> <tr> <td rowspan="2">III</td> <td></td> <td></td> <td></td> <td></td> <td></td> <td></td> </tr> <tr> <td></td> <td></td> <td></td> <td></td> <td></td> <td></td> </tr> </table>                   | I |  |  |  |  |  |  |  |  |  |  |  |  | II |  |  |  |  |  |  |  |  |  |  |  |  | III                                                                                                                           |                                                                                                                       |  |  |  |  |  |  |  |  |  |  |  |                                             |                                    | Notes: none |
| I   |                                            |                                                                                                                                                                                                                                                                                                                                                                                                                                                                                                                                                                 |   |  |  |  |  |  |  |  |  |  |  |  |  |    |  |  |  |  |  |  |  |  |  |  |  |  |                                                                                                                               |                                                                                                                       |  |  |  |  |  |  |  |  |  |  |  |                                                                                                                               |                                                                                                                       |             |
|     |                                            |                                                                                                                                                                                                                                                                                                                                                                                                                                                                                                                                                                 |   |  |  |  |  |  |  |  |  |  |  |  |  |    |  |  |  |  |  |  |  |  |  |  |  |  |                                                                                                                               |                                                                                                                       |  |  |  |  |  |  |  |  |  |  |  |                                                                                                                               |                                                                                                                       |             |
| II  |                                            |                                                                                                                                                                                                                                                                                                                                                                                                                                                                                                                                                                 |   |  |  |  |  |  |  |  |  |  |  |  |  |    |  |  |  |  |  |  |  |  |  |  |  |  |                                                                                                                               |                                                                                                                       |  |  |  |  |  |  |  |  |  |  |  |                                                                                                                               |                                                                                                                       |             |
|     |                                            |                                                                                                                                                                                                                                                                                                                                                                                                                                                                                                                                                                 |   |  |  |  |  |  |  |  |  |  |  |  |  |    |  |  |  |  |  |  |  |  |  |  |  |  |                                                                                                                               |                                                                                                                       |  |  |  |  |  |  |  |  |  |  |  |                                                                                                                               |                                                                                                                       |             |
| III |                                            |                                                                                                                                                                                                                                                                                                                                                                                                                                                                                                                                                                 |   |  |  |  |  |  |  |  |  |  |  |  |  |    |  |  |  |  |  |  |  |  |  |  |  |  |                                                                                                                               |                                                                                                                       |  |  |  |  |  |  |  |  |  |  |  |                                                                                                                               |                                                                                                                       |             |
|     |                                            |                                                                                                                                                                                                                                                                                                                                                                                                                                                                                                                                                                 |   |  |  |  |  |  |  |  |  |  |  |  |  |    |  |  |  |  |  |  |  |  |  |  |  |  |                                                                                                                               |                                                                                                                       |  |  |  |  |  |  |  |  |  |  |  |                                                                                                                               |                                                                                                                       |             |
| 31  | <b>Date of observation</b><br><br>26.09.17 | <b>Phenophase</b> <table border="1"> <tr> <td rowspan="2">I</td> <td></td> <td></td> <td></td> <td></td> <td></td> <td></td> </tr> <tr> <td></td> <td></td> <td></td> <td></td> <td></td> <td></td> </tr> <tr> <td rowspan="2">II</td> <td></td> <td></td> <td></td> <td></td> <td></td> <td></td> </tr> <tr> <td></td> <td></td> <td></td> <td></td> <td></td> <td></td> </tr> <tr> <td rowspan="2">III</td> <td></td> <td></td> <td></td> <td></td> <td></td> <td></td> </tr> <tr> <td></td> <td></td> <td></td> <td></td> <td></td> <td></td> </tr> </table> | I |  |  |  |  |  |  |  |  |  |  |  |  | II |  |  |  |  |  |  |  |  |  |  |  |  | III                                                                                                                           |                                                                                                                       |  |  |  |  |  |  |  |  |  |  |  | <b>Photo of the entire object</b><br><br>  | <b>Photos of details</b><br><br>  | Notes: none |
| I   |                                            |                                                                                                                                                                                                                                                                                                                                                                                                                                                                                                                                                                 |   |  |  |  |  |  |  |  |  |  |  |  |  |    |  |  |  |  |  |  |  |  |  |  |  |  |                                                                                                                               |                                                                                                                       |  |  |  |  |  |  |  |  |  |  |  |                                                                                                                               |                                                                                                                       |             |
|     |                                            |                                                                                                                                                                                                                                                                                                                                                                                                                                                                                                                                                                 |   |  |  |  |  |  |  |  |  |  |  |  |  |    |  |  |  |  |  |  |  |  |  |  |  |  |                                                                                                                               |                                                                                                                       |  |  |  |  |  |  |  |  |  |  |  |                                                                                                                               |                                                                                                                       |             |
| II  |                                            |                                                                                                                                                                                                                                                                                                                                                                                                                                                                                                                                                                 |   |  |  |  |  |  |  |  |  |  |  |  |  |    |  |  |  |  |  |  |  |  |  |  |  |  |                                                                                                                               |                                                                                                                       |  |  |  |  |  |  |  |  |  |  |  |                                                                                                                               |                                                                                                                       |             |
|     |                                            |                                                                                                                                                                                                                                                                                                                                                                                                                                                                                                                                                                 |   |  |  |  |  |  |  |  |  |  |  |  |  |    |  |  |  |  |  |  |  |  |  |  |  |  |                                                                                                                               |                                                                                                                       |  |  |  |  |  |  |  |  |  |  |  |                                                                                                                               |                                                                                                                       |             |
| III |                                            |                                                                                                                                                                                                                                                                                                                                                                                                                                                                                                                                                                 |   |  |  |  |  |  |  |  |  |  |  |  |  |    |  |  |  |  |  |  |  |  |  |  |  |  |                                                                                                                               |                                                                                                                       |  |  |  |  |  |  |  |  |  |  |  |                                                                                                                               |                                                                                                                       |             |
|     |                                            |                                                                                                                                                                                                                                                                                                                                                                                                                                                                                                                                                                 |   |  |  |  |  |  |  |  |  |  |  |  |  |    |  |  |  |  |  |  |  |  |  |  |  |  |                                                                                                                               |                                                                                                                       |  |  |  |  |  |  |  |  |  |  |  |                                                                                                                               |                                                                                                                       |             |
| 32  | <b>Date of observation</b><br><br>01.10.17 | <b>Phenophase</b> <table border="1"> <tr> <td rowspan="2">I</td> <td></td> <td></td> <td></td> <td></td> <td></td> <td></td> </tr> <tr> <td></td> <td></td> <td></td> <td></td> <td></td> <td></td> </tr> <tr> <td rowspan="2">II</td> <td></td> <td></td> <td></td> <td></td> <td></td> <td></td> </tr> <tr> <td></td> <td></td> <td></td> <td></td> <td></td> <td></td> </tr> <tr> <td rowspan="2">III</td> <td></td> <td></td> <td></td> <td></td> <td></td> <td></td> </tr> <tr> <td></td> <td></td> <td></td> <td></td> <td></td> <td></td> </tr> </table> | I |  |  |  |  |  |  |  |  |  |  |  |  | II |  |  |  |  |  |  |  |  |  |  |  |  | III                                                                                                                           |                                                                                                                       |  |  |  |  |  |  |  |  |  |  |  | <b>Photo of the entire object</b><br><br> | <b>Photos of details</b><br><br> | Notes: none |
| I   |                                            |                                                                                                                                                                                                                                                                                                                                                                                                                                                                                                                                                                 |   |  |  |  |  |  |  |  |  |  |  |  |  |    |  |  |  |  |  |  |  |  |  |  |  |  |                                                                                                                               |                                                                                                                       |  |  |  |  |  |  |  |  |  |  |  |                                                                                                                               |                                                                                                                       |             |
|     |                                            |                                                                                                                                                                                                                                                                                                                                                                                                                                                                                                                                                                 |   |  |  |  |  |  |  |  |  |  |  |  |  |    |  |  |  |  |  |  |  |  |  |  |  |  |                                                                                                                               |                                                                                                                       |  |  |  |  |  |  |  |  |  |  |  |                                                                                                                               |                                                                                                                       |             |
| II  |                                            |                                                                                                                                                                                                                                                                                                                                                                                                                                                                                                                                                                 |   |  |  |  |  |  |  |  |  |  |  |  |  |    |  |  |  |  |  |  |  |  |  |  |  |  |                                                                                                                               |                                                                                                                       |  |  |  |  |  |  |  |  |  |  |  |                                                                                                                               |                                                                                                                       |             |
|     |                                            |                                                                                                                                                                                                                                                                                                                                                                                                                                                                                                                                                                 |   |  |  |  |  |  |  |  |  |  |  |  |  |    |  |  |  |  |  |  |  |  |  |  |  |  |                                                                                                                               |                                                                                                                       |  |  |  |  |  |  |  |  |  |  |  |                                                                                                                               |                                                                                                                       |             |
| III |                                            |                                                                                                                                                                                                                                                                                                                                                                                                                                                                                                                                                                 |   |  |  |  |  |  |  |  |  |  |  |  |  |    |  |  |  |  |  |  |  |  |  |  |  |  |                                                                                                                               |                                                                                                                       |  |  |  |  |  |  |  |  |  |  |  |                                                                                                                               |                                                                                                                       |             |
|     |                                            |                                                                                                                                                                                                                                                                                                                                                                                                                                                                                                                                                                 |   |  |  |  |  |  |  |  |  |  |  |  |  |    |  |  |  |  |  |  |  |  |  |  |  |  |                                                                                                                               |                                                                                                                       |  |  |  |  |  |  |  |  |  |  |  |                                                                                                                               |                                                                                                                       |             |
| 33  | <b>Date of observation</b><br><br>07.10.17 | <b>Phenophase</b> <table border="1"> <tr> <td rowspan="2">I</td> <td></td> <td></td> <td></td> <td></td> <td></td> <td></td> </tr> <tr> <td></td> <td></td> <td></td> <td></td> <td></td> <td></td> </tr> <tr> <td rowspan="2">II</td> <td></td> <td></td> <td></td> <td></td> <td></td> <td></td> </tr> <tr> <td></td> <td></td> <td></td> <td></td> <td></td> <td></td> </tr> </table>                                                                                                                                                                        | I |  |  |  |  |  |  |  |  |  |  |  |  | II |  |  |  |  |  |  |  |  |  |  |  |  | <b>Photo of the entire object</b><br><br> | <b>Photos of details</b><br><br> |  |  |  |  |  |  |  |  |  |  |  |                                                                                                                               |                                                                                                                       |             |
| I   |                                            |                                                                                                                                                                                                                                                                                                                                                                                                                                                                                                                                                                 |   |  |  |  |  |  |  |  |  |  |  |  |  |    |  |  |  |  |  |  |  |  |  |  |  |  |                                                                                                                               |                                                                                                                       |  |  |  |  |  |  |  |  |  |  |  |                                                                                                                               |                                                                                                                       |             |
|     |                                            |                                                                                                                                                                                                                                                                                                                                                                                                                                                                                                                                                                 |   |  |  |  |  |  |  |  |  |  |  |  |  |    |  |  |  |  |  |  |  |  |  |  |  |  |                                                                                                                               |                                                                                                                       |  |  |  |  |  |  |  |  |  |  |  |                                                                                                                               |                                                                                                                       |             |
| II  |                                            |                                                                                                                                                                                                                                                                                                                                                                                                                                                                                                                                                                 |   |  |  |  |  |  |  |  |  |  |  |  |  |    |  |  |  |  |  |  |  |  |  |  |  |  |                                                                                                                               |                                                                                                                       |  |  |  |  |  |  |  |  |  |  |  |                                                                                                                               |                                                                                                                       |             |
|     |                                            |                                                                                                                                                                                                                                                                                                                                                                                                                                                                                                                                                                 |   |  |  |  |  |  |  |  |  |  |  |  |  |    |  |  |  |  |  |  |  |  |  |  |  |  |                                                                                                                               |                                                                                                                       |  |  |  |  |  |  |  |  |  |  |  |                                                                                                                               |                                                                                                                       |             |

|     |  |                                                                                                                                                                                                                                                                                             |  |  |  |  |  |  |  |  |     |  |  |  |  |  |  |  |  |  |  |  |  |  |  |  |                                                                                                                                                                        |
|-----|--|---------------------------------------------------------------------------------------------------------------------------------------------------------------------------------------------------------------------------------------------------------------------------------------------|--|--|--|--|--|--|--|--|-----|--|--|--|--|--|--|--|--|--|--|--|--|--|--|--|------------------------------------------------------------------------------------------------------------------------------------------------------------------------|
|     |  | <table border="1"> <tr> <td></td><td></td><td></td><td></td><td></td><td></td><td></td><td></td> </tr> <tr> <td>III</td> <td></td><td></td><td></td><td></td><td></td><td></td><td></td> </tr> <tr> <td></td><td></td><td></td><td></td><td></td><td></td><td></td><td></td> </tr> </table> |  |  |  |  |  |  |  |  | III |  |  |  |  |  |  |  |  |  |  |  |  |  |  |  |   |
|     |  |                                                                                                                                                                                                                                                                                             |  |  |  |  |  |  |  |  |     |  |  |  |  |  |  |  |  |  |  |  |  |  |  |  |                                                                                                                                                                        |
| III |  |                                                                                                                                                                                                                                                                                             |  |  |  |  |  |  |  |  |     |  |  |  |  |  |  |  |  |  |  |  |  |  |  |  |                                                                                                                                                                        |
|     |  |                                                                                                                                                                                                                                                                                             |  |  |  |  |  |  |  |  |     |  |  |  |  |  |  |  |  |  |  |  |  |  |  |  |                                                                                                                                                                        |

|     |                                        |                                                                                                                                                                                                                                                                                                                                                                                                                                                                                                                                                                                |   |  |  |  |  |  |  |  |  |  |  |  |  |  |  |  |    |  |  |  |  |  |  |  |  |  |  |  |  |  |  |  |     |  |  |  |  |  |  |  |  |  |  |  |  |  |  |  |                                                                                                                          |                                                                                                                  |             |
|-----|----------------------------------------|--------------------------------------------------------------------------------------------------------------------------------------------------------------------------------------------------------------------------------------------------------------------------------------------------------------------------------------------------------------------------------------------------------------------------------------------------------------------------------------------------------------------------------------------------------------------------------|---|--|--|--|--|--|--|--|--|--|--|--|--|--|--|--|----|--|--|--|--|--|--|--|--|--|--|--|--|--|--|--|-----|--|--|--|--|--|--|--|--|--|--|--|--|--|--|--|--------------------------------------------------------------------------------------------------------------------------|------------------------------------------------------------------------------------------------------------------|-------------|
| 34  | <b>Date of observation</b><br>14.10.17 | <b>Phenophase</b> <table border="1"> <tr> <td>I</td> <td></td><td></td><td></td><td></td><td></td><td></td><td></td> </tr> <tr> <td></td><td></td><td></td><td></td><td></td><td></td><td></td><td></td> </tr> <tr> <td>II</td> <td></td><td></td><td></td><td></td><td></td><td></td><td></td> </tr> <tr> <td></td><td></td><td></td><td></td><td></td><td></td><td></td><td></td> </tr> <tr> <td>III</td> <td></td><td></td><td></td><td></td><td></td><td></td><td></td> </tr> <tr> <td></td><td></td><td></td><td></td><td></td><td></td><td></td><td></td> </tr> </table> | I |  |  |  |  |  |  |  |  |  |  |  |  |  |  |  | II |  |  |  |  |  |  |  |  |  |  |  |  |  |  |  | III |  |  |  |  |  |  |  |  |  |  |  |  |  |  |  | <b>Photo of the entire object</b><br> | <b>Photos of details</b><br> | Notes: none |
| I   |                                        |                                                                                                                                                                                                                                                                                                                                                                                                                                                                                                                                                                                |   |  |  |  |  |  |  |  |  |  |  |  |  |  |  |  |    |  |  |  |  |  |  |  |  |  |  |  |  |  |  |  |     |  |  |  |  |  |  |  |  |  |  |  |  |  |  |  |                                                                                                                          |                                                                                                                  |             |
|     |                                        |                                                                                                                                                                                                                                                                                                                                                                                                                                                                                                                                                                                |   |  |  |  |  |  |  |  |  |  |  |  |  |  |  |  |    |  |  |  |  |  |  |  |  |  |  |  |  |  |  |  |     |  |  |  |  |  |  |  |  |  |  |  |  |  |  |  |                                                                                                                          |                                                                                                                  |             |
| II  |                                        |                                                                                                                                                                                                                                                                                                                                                                                                                                                                                                                                                                                |   |  |  |  |  |  |  |  |  |  |  |  |  |  |  |  |    |  |  |  |  |  |  |  |  |  |  |  |  |  |  |  |     |  |  |  |  |  |  |  |  |  |  |  |  |  |  |  |                                                                                                                          |                                                                                                                  |             |
|     |                                        |                                                                                                                                                                                                                                                                                                                                                                                                                                                                                                                                                                                |   |  |  |  |  |  |  |  |  |  |  |  |  |  |  |  |    |  |  |  |  |  |  |  |  |  |  |  |  |  |  |  |     |  |  |  |  |  |  |  |  |  |  |  |  |  |  |  |                                                                                                                          |                                                                                                                  |             |
| III |                                        |                                                                                                                                                                                                                                                                                                                                                                                                                                                                                                                                                                                |   |  |  |  |  |  |  |  |  |  |  |  |  |  |  |  |    |  |  |  |  |  |  |  |  |  |  |  |  |  |  |  |     |  |  |  |  |  |  |  |  |  |  |  |  |  |  |  |                                                                                                                          |                                                                                                                  |             |
|     |                                        |                                                                                                                                                                                                                                                                                                                                                                                                                                                                                                                                                                                |   |  |  |  |  |  |  |  |  |  |  |  |  |  |  |  |    |  |  |  |  |  |  |  |  |  |  |  |  |  |  |  |     |  |  |  |  |  |  |  |  |  |  |  |  |  |  |  |                                                                                                                          |                                                                                                                  |             |

|     |                                        |                                                                                                                                                                                                                                                                                                                                                                                                                                                                                                                                                                                |   |  |  |  |  |  |  |  |  |  |  |  |  |  |  |  |    |  |  |  |  |  |  |  |  |  |  |  |  |  |  |  |     |  |  |  |  |  |  |  |  |  |  |  |  |  |  |  |                                                                                                                           |                                                                                                                   |             |
|-----|----------------------------------------|--------------------------------------------------------------------------------------------------------------------------------------------------------------------------------------------------------------------------------------------------------------------------------------------------------------------------------------------------------------------------------------------------------------------------------------------------------------------------------------------------------------------------------------------------------------------------------|---|--|--|--|--|--|--|--|--|--|--|--|--|--|--|--|----|--|--|--|--|--|--|--|--|--|--|--|--|--|--|--|-----|--|--|--|--|--|--|--|--|--|--|--|--|--|--|--|---------------------------------------------------------------------------------------------------------------------------|-------------------------------------------------------------------------------------------------------------------|-------------|
| 35  | <b>Date of observation</b><br>21.10.17 | <b>Phenophase</b> <table border="1"> <tr> <td>I</td> <td></td><td></td><td></td><td></td><td></td><td></td><td></td> </tr> <tr> <td></td><td></td><td></td><td></td><td></td><td></td><td></td><td></td> </tr> <tr> <td>II</td> <td></td><td></td><td></td><td></td><td></td><td></td><td></td> </tr> <tr> <td></td><td></td><td></td><td></td><td></td><td></td><td></td><td></td> </tr> <tr> <td>III</td> <td></td><td></td><td></td><td></td><td></td><td></td><td></td> </tr> <tr> <td></td><td></td><td></td><td></td><td></td><td></td><td></td><td></td> </tr> </table> | I |  |  |  |  |  |  |  |  |  |  |  |  |  |  |  | II |  |  |  |  |  |  |  |  |  |  |  |  |  |  |  | III |  |  |  |  |  |  |  |  |  |  |  |  |  |  |  | <b>Photo of the entire object</b><br> | <b>Photos of details</b><br> | Notes: none |
| I   |                                        |                                                                                                                                                                                                                                                                                                                                                                                                                                                                                                                                                                                |   |  |  |  |  |  |  |  |  |  |  |  |  |  |  |  |    |  |  |  |  |  |  |  |  |  |  |  |  |  |  |  |     |  |  |  |  |  |  |  |  |  |  |  |  |  |  |  |                                                                                                                           |                                                                                                                   |             |
|     |                                        |                                                                                                                                                                                                                                                                                                                                                                                                                                                                                                                                                                                |   |  |  |  |  |  |  |  |  |  |  |  |  |  |  |  |    |  |  |  |  |  |  |  |  |  |  |  |  |  |  |  |     |  |  |  |  |  |  |  |  |  |  |  |  |  |  |  |                                                                                                                           |                                                                                                                   |             |
| II  |                                        |                                                                                                                                                                                                                                                                                                                                                                                                                                                                                                                                                                                |   |  |  |  |  |  |  |  |  |  |  |  |  |  |  |  |    |  |  |  |  |  |  |  |  |  |  |  |  |  |  |  |     |  |  |  |  |  |  |  |  |  |  |  |  |  |  |  |                                                                                                                           |                                                                                                                   |             |
|     |                                        |                                                                                                                                                                                                                                                                                                                                                                                                                                                                                                                                                                                |   |  |  |  |  |  |  |  |  |  |  |  |  |  |  |  |    |  |  |  |  |  |  |  |  |  |  |  |  |  |  |  |     |  |  |  |  |  |  |  |  |  |  |  |  |  |  |  |                                                                                                                           |                                                                                                                   |             |
| III |                                        |                                                                                                                                                                                                                                                                                                                                                                                                                                                                                                                                                                                |   |  |  |  |  |  |  |  |  |  |  |  |  |  |  |  |    |  |  |  |  |  |  |  |  |  |  |  |  |  |  |  |     |  |  |  |  |  |  |  |  |  |  |  |  |  |  |  |                                                                                                                           |                                                                                                                   |             |
|     |                                        |                                                                                                                                                                                                                                                                                                                                                                                                                                                                                                                                                                                |   |  |  |  |  |  |  |  |  |  |  |  |  |  |  |  |    |  |  |  |  |  |  |  |  |  |  |  |  |  |  |  |     |  |  |  |  |  |  |  |  |  |  |  |  |  |  |  |                                                                                                                           |                                                                                                                   |             |

|     |                                        |                                                                                                                                                                                                                                                                                                                                                                                                                                                                                                                                                                                |   |  |  |  |  |  |  |  |  |  |  |  |  |  |  |  |    |  |  |  |  |  |  |  |  |  |  |  |  |  |  |  |     |  |  |  |  |  |  |  |  |  |  |  |  |  |  |  |                                                                                                                           |                                                                                                                   |  |
|-----|----------------------------------------|--------------------------------------------------------------------------------------------------------------------------------------------------------------------------------------------------------------------------------------------------------------------------------------------------------------------------------------------------------------------------------------------------------------------------------------------------------------------------------------------------------------------------------------------------------------------------------|---|--|--|--|--|--|--|--|--|--|--|--|--|--|--|--|----|--|--|--|--|--|--|--|--|--|--|--|--|--|--|--|-----|--|--|--|--|--|--|--|--|--|--|--|--|--|--|--|---------------------------------------------------------------------------------------------------------------------------|-------------------------------------------------------------------------------------------------------------------|--|
| 36  | <b>Date of observation</b><br>28.10.17 | <b>Phenophase</b> <table border="1"> <tr> <td>I</td> <td></td><td></td><td></td><td></td><td></td><td></td><td></td> </tr> <tr> <td></td><td></td><td></td><td></td><td></td><td></td><td></td><td></td> </tr> <tr> <td>II</td> <td></td><td></td><td></td><td></td><td></td><td></td><td></td> </tr> <tr> <td></td><td></td><td></td><td></td><td></td><td></td><td></td><td></td> </tr> <tr> <td>III</td> <td></td><td></td><td></td><td></td><td></td><td></td><td></td> </tr> <tr> <td></td><td></td><td></td><td></td><td></td><td></td><td></td><td></td> </tr> </table> | I |  |  |  |  |  |  |  |  |  |  |  |  |  |  |  | II |  |  |  |  |  |  |  |  |  |  |  |  |  |  |  | III |  |  |  |  |  |  |  |  |  |  |  |  |  |  |  | <b>Photo of the entire object</b><br> | <b>Photos of details</b><br> |  |
| I   |                                        |                                                                                                                                                                                                                                                                                                                                                                                                                                                                                                                                                                                |   |  |  |  |  |  |  |  |  |  |  |  |  |  |  |  |    |  |  |  |  |  |  |  |  |  |  |  |  |  |  |  |     |  |  |  |  |  |  |  |  |  |  |  |  |  |  |  |                                                                                                                           |                                                                                                                   |  |
|     |                                        |                                                                                                                                                                                                                                                                                                                                                                                                                                                                                                                                                                                |   |  |  |  |  |  |  |  |  |  |  |  |  |  |  |  |    |  |  |  |  |  |  |  |  |  |  |  |  |  |  |  |     |  |  |  |  |  |  |  |  |  |  |  |  |  |  |  |                                                                                                                           |                                                                                                                   |  |
| II  |                                        |                                                                                                                                                                                                                                                                                                                                                                                                                                                                                                                                                                                |   |  |  |  |  |  |  |  |  |  |  |  |  |  |  |  |    |  |  |  |  |  |  |  |  |  |  |  |  |  |  |  |     |  |  |  |  |  |  |  |  |  |  |  |  |  |  |  |                                                                                                                           |                                                                                                                   |  |
|     |                                        |                                                                                                                                                                                                                                                                                                                                                                                                                                                                                                                                                                                |   |  |  |  |  |  |  |  |  |  |  |  |  |  |  |  |    |  |  |  |  |  |  |  |  |  |  |  |  |  |  |  |     |  |  |  |  |  |  |  |  |  |  |  |  |  |  |  |                                                                                                                           |                                                                                                                   |  |
| III |                                        |                                                                                                                                                                                                                                                                                                                                                                                                                                                                                                                                                                                |   |  |  |  |  |  |  |  |  |  |  |  |  |  |  |  |    |  |  |  |  |  |  |  |  |  |  |  |  |  |  |  |     |  |  |  |  |  |  |  |  |  |  |  |  |  |  |  |                                                                                                                           |                                                                                                                   |  |
|     |                                        |                                                                                                                                                                                                                                                                                                                                                                                                                                                                                                                                                                                |   |  |  |  |  |  |  |  |  |  |  |  |  |  |  |  |    |  |  |  |  |  |  |  |  |  |  |  |  |  |  |  |     |  |  |  |  |  |  |  |  |  |  |  |  |  |  |  |                                                                                                                           |                                                                                                                   |  |
